# Supplementary material for: Urban–rural differences in overweight and obesity among 25–64 years old Myanmar residents: a cross-sectional, nationwide survey
Source: PubMed Central journal article supplement — BMJ Open. 2021 Mar 2;11(3):e042561. doi: 10.1136/bmjopen-2020-042561 (PMC7929804; doi:10.1136/bmjopen-2020-042561), 2021-03-02
Supplement: bmjopen-2020-042561.draft_revisions.pdf [file bmjopen-2020-042561.draft_revisions.pdf]

# BMJ Open

BMJ Open is committed to open peer review. As part of this commitment we make the peer review history of every article we publish publicly available.

When an article is published we post the peer reviewers' comments and the authors' responses online. We also post the versions of the paper that were used during peer review. These are the versions that the peer review comments apply to.

The versions of the paper that follow are the versions that were submitted during the peer review process. They are not the versions of record or the final published versions. They should not be cited or distributed as the published version of this manuscript.

BMJ Open is an open access journal and the full, final, typeset and author-corrected version of record of the manuscript is available on our site with no access controls, subscription charges or pay-per-view fees (<http://bmjopen.bmj.com>).

If you have any questions on BMJ Open's open peer review process please email [info.bmjopen@bmj.com](mailto:info.bmjopen@bmj.com)

# BMJ Open

## Urban-rural differences in overweight and obesity among 25-64 years old Myanmar residents: a cross-sectional, nationwide survey

|                               |                                                                                                                                                                                                                                                                                                                                                                                                                                                                                                                                                                 |
|-------------------------------|-----------------------------------------------------------------------------------------------------------------------------------------------------------------------------------------------------------------------------------------------------------------------------------------------------------------------------------------------------------------------------------------------------------------------------------------------------------------------------------------------------------------------------------------------------------------|
| Journal:                      | <i>BMJ Open</i>                                                                                                                                                                                                                                                                                                                                                                                                                                                                                                                                                 |
| Manuscript ID                 | bmjopen-2020-042561                                                                                                                                                                                                                                                                                                                                                                                                                                                                                                                                             |
| Article Type:                 | Original research                                                                                                                                                                                                                                                                                                                                                                                                                                                                                                                                               |
| Date Submitted by the Author: | 08-Jul-2020                                                                                                                                                                                                                                                                                                                                                                                                                                                                                                                                                     |
| Complete List of Authors:     | Thapa, Rupa; University of Oslo Faculty of Medicine, Department of Community Medicine and Global Health<br>Dahl, Cecilie; University of Oslo Faculty of Medicine, Department of Community Medicine and Global health<br>Aung , Wai Phyo; University of Oslo Faculty of Medicine, Department of Community Medicine and Global health; Ministry of Health and Sports, Department of Public Health, Occupational and Environmental Health Division<br>Bjertness, Espen; University of Oslo Faculty of Medicine, Department of Community Medicine and Global health |
| Keywords:                     | PUBLIC HEALTH, EPIDEMIOLOGY, PREVENTIVE MEDICINE                                                                                                                                                                                                                                                                                                                                                                                                                                                                                                                |
|                               |                                                                                                                                                                                                                                                                                                                                                                                                                                                                                                                                                                 |

SCHOLARONE™  
Manuscripts

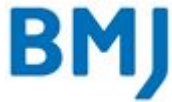

I, the Submitting Author has the right to grant and does grant on behalf of all authors of the Work (as defined in the below author licence), an exclusive licence and/or a non-exclusive licence for contributions from authors who are: i) UK Crown employees; ii) where BMJ has agreed a CC-BY licence shall apply, and/or iii) in accordance with the terms applicable for US Federal Government officers or employees acting as part of their official duties; on a worldwide, perpetual, irrevocable, royalty-free basis to BMJ Publishing Group Ltd ("BMJ") its licensees and where the relevant Journal is co-owned by BMJ to the co-owners of the Journal, to publish the Work in this journal and any other BMJ products and to exploit all rights, as set out in our [licence](#).

The Submitting Author accepts and understands that any supply made under these terms is made by BMJ to the Submitting Author unless you are acting as an employee on behalf of your employer or a postgraduate student of an affiliated institution which is paying any applicable article publishing charge ("APC") for Open Access articles. Where the Submitting Author wishes to make the Work available on an Open Access basis (and intends to pay the relevant APC), the terms of reuse of such Open Access shall be governed by a Creative Commons licence – details of these licences and which [Creative Commons](#) licence will apply to this Work are set out in our licence referred to above.

Other than as permitted in any relevant BMJ Author's Self Archiving Policies, I confirm this Work has not been accepted for publication elsewhere, is not being considered for publication elsewhere and does not duplicate material already published. I confirm all authors consent to publication of this Work and authorise the granting of this licence.

1  
2  
3 **Urban-rural differences in overweight and obesity among 25-64 years old Myanmar**  
4 **residents: a cross-sectional, nationwide survey**  
5  
6

7 **Rupa Thapa<sup>1</sup>, Cecilie Dahl<sup>1</sup>, Wai Phyo Aung<sup>1,2</sup>, Espen Bjertness<sup>1</sup>**  
8

9 **Author Affiliations**  
10

11  
12 1. Department of Community Medicine and Global Health, Institute of Health and Society,  
13 Faculty of Medicine, University of Oslo, Oslo 0318, Norway; espen.bjertness@medisin.uio.no  
14 (EB); cecilie.dahl@medisin.uio.no (CD); rupathapa.rupa@gmail.com (RT)  
15  
16

17  
18 2. Occupational and Environmental Health Division, Department of Public Health, Ministry of  
19 Health and Sports, Nay Pyi Taw 15011, Myanmar; w.p.aung@medisin.uio.no (WPA)  
20  
21

22 Correspondence to rupathapa.rupa@gmail.com  
23

24 Word count: 4,362  
25

26 **Abstract**  
27

28  
29 **Objectives:** To investigate whether urban-rural location and socioeconomic factors (income,  
30 education, and employment) are associated with body mass index (BMI) and waist-hip ratio  
31 (W/H-ratio), and to further explore whether the associations between urban-rural location and  
32 BMI or W/H-ratio could be mediated through variations in socioeconomic factors.  
33  
34

35  
36 **Design:** Cross-sectional, WHO STEPS survey of non-communicable disease (NCD) risk  
37 factors  
38  
39

40 **Setting:** Urban and rural areas of Myanmar  
41  
42

43 **Participants:** A total of 8,390 men and women aged 25 to 64 years included during the study  
44 period from September to December 2014. Institutionalized people (Buddhist monks and  
45 nuns, hospitalized patients) and temporary residents were excluded.  
46  
47

48  
49 **Results:** The prevalence of overweight and obesity was higher in the urban areas and  
50 increased with increasing SES score. Mean BMI was higher among urban residents ( $\beta= 2.49$   
51  $\text{kg/m}^2$ ; 95% CI 2.28, 2.70;  $p<0.001$ ), individuals living above poverty line, i.e.  $\geq 1.9$  USD/day  
52 ( $\beta= 0.74 \text{ kg/m}^2$ ; 95% CI 0.43, 1.05;  $p<0.001$ ), and those with high education attainment ( $\beta=$   
53  $1.48 \text{ kg/m}^2$ ; 95% CI 1.13, 1.82;  $p<0.001$ ) when adjusting for potential confounders. Similarly,  
54 greater W/H-ratio was observed in participants living in an urban area, among those with  
55 earnings above poverty line, and among unemployed individuals. The association between  
56  
57  
58  
59  
60

1  
2  
3 urban-rural location and BMI was found to be partially mediated by a composite SES score  
4 (9%), income (17%), education (16%), and employment (16%), while the association between  
5 urban-rural location and W/H-ratio was found to be partially mediated by income (12%),  
6 education (6%), and employment (6%).  
7  
8  
9

10 **Conclusion:** Residents living in urban locations had higher BMI and greater W/H-ratio,  
11 partially explained by differences in socioeconomic indicators, indicating that socioeconomic  
12 factors should be emphasized in the management of overweight and obesity in the Myanmar  
13 population. Furthermore, new national or sub-national STEPS surveys should be conducted in  
14 Myanmar to observe the disparity in trends of the urban-rural differential.  
15  
16  
17  
18  
19

### 20 **Strengths and limitation of this study**

- 21 • The study analyses a large nationally representative sample including both urban and
- 22 rural areas.
- 23 • The internationally recommended WHO STEPS protocol was followed.
- 24 • The response rate was high (91%).
- 25 • The findings may be generalized to Myanmar's non-institutionalized population only.
- 26 • Due to cross-sectional nature of the study, causality cannot be determined.
- 27
- 28
- 29
- 30
- 31
- 32
- 33

### 34 **INTRODUCTION**

35  
36 Overweight and obesity pose a major economic burden to society, and are important  
37 determinants for non-communicable diseases (NCDs), including cardiovascular diseases  
38 (CVDs), diabetes, musculoskeletal disorders, and certain types of cancers.<sup>1</sup> An even greater  
39 risk seems to be associated with excess abdominal obesity.<sup>2,3</sup> According to the World Health  
40 Organization (WHO), 39% of adults worldwide were overweight and 13% were obese in  
41 2016.<sup>1</sup> In the South-east Asia region (SEAR), the estimated proportions of overweight and  
42 obese were 21.5% and 4.6%, respectively.<sup>4,5</sup>  
43  
44  
45  
46  
47  
48

49 Urbanization, a complex socioeconomic process that gradually transforms the society from  
50 rural into urban settlements, including migrations of people from rural to urban areas, is  
51 frequently cited as the most important factor contributing to increasing overweight and  
52 obesity, explained by increased access to unhealthy foods and a less physically active lifestyle  
53 in urban areas.<sup>6-9</sup> Moreover, among urban residents the socioeconomic status (SES) is likely  
54 to be higher, which in turn is associated with higher body mass index (BMI) in most low- and  
55 middle-income countries (LMICs).<sup>10,11</sup> However, a recent publication by the NCD risk Factor  
56  
57  
58  
59  
60

1  
2  
3 Collaboration comprising evidence from 2,009 population-based studies on trends in mean  
4 BMI (from 1985 to 2017), showed that increasing BMI in rural areas has been the main  
5 contributor to the global rise in mean BMI over the last 33 years, while the contribution from  
6 rural to urban migration was small.<sup>12</sup>  
7  
8  
9

10 In Myanmar, two surveys were carried out in 2004 and 2014 in the most populated and  
11 developed part of Myanmar, the Yangon region.<sup>13,14</sup> Findings from these studies indicate  
12 increasing trends in overweight and obesity. The overall prevalence of combined overweight  
13 and obesity in urban areas of Yangon increased from 39.8% in 2004 to 40.9% in 2014,  
14 whereas in rural areas, there was an increase in overweight and obesity prevalence from  
15 23.0% to 31.2%.<sup>14-16</sup> In 2009, a nationwide survey in Myanmar found an overall prevalence of  
16 overweight and obesity of 18.7% and 6.8% respectively.<sup>17</sup> The most recent nationwide study  
17 (2015-2016), the Myanmar Demographic and Health Survey,<sup>18</sup> included 12,160 women in  
18 reproductive age, and reported a high prevalence of overweight (28.1%) and obesity (13.1%),  
19 and a significantly higher proportion of overweight and obesity with urban residency, higher  
20 economic status, and having secondary education.  
21  
22  
23  
24  
25  
26  
27  
28  
29

30 Myanmar has been lagging behind neighbouring countries in terms of sociodemographic  
31 development, which could partly be due to socio-political difficulties during more than 50  
32 years of military rule, which was gradually replaced with a democratic development in  
33 2011.<sup>19</sup> In order to contribute to a better understanding of socioeconomic determinants of  
34 overweight and obesity in Myanmar, we analysed a nationally representative sample of 25-64  
35 year old men and women from 2014,<sup>20</sup> with the following objectives: 1) to investigate  
36 associations of urban-rural location with BMI and waist-hip ratio (W/H-ratio); 2) to explore  
37 the association of selected socioeconomic characteristics (income, education, and employment  
38 status) with BMI and W/H-ratio; and 3) to assess whether the potential associations between  
39 urban-rural location and BMI or W/H-ratio could be explained by (i.e. mediated through)  
40 variations in socioeconomic characteristics (income, education, and employment status).  
41  
42  
43  
44  
45  
46  
47  
48  
49

## 50 **METHODS**

### 51 **Study design, sampling, and participants**

52 A national cross-sectional survey of NCD risk factors in Myanmar (WHO STEPS survey) was  
53 conducted between September and December 2014 in 52 different townships in Myanmar.<sup>20</sup>  
54  
55  
56  
57

58 A detailed methodological description of the sampling and data collection has been published  
59 previously,<sup>20</sup> and is summarized below.  
60

1  
2  
3 The STEPS survey used a multistage cluster sampling method for the selection of townships,  
4 wards and villages, households, and eligible participants at each of the selected households.  
5  
6 The first stage of the sampling method consisted of townships, which formed the Primary  
7 Sampling Units (PSUs). Overall, 52 PSUs were selected out of the total of 330 townships,  
8 using probability proportionate to size of population in each PSU (PPS). In the second stage,  
9 six Secondary Sampling Units (SSUs) i.e., wards (from urban townships) and villages (from  
10 rural townships) were selected from each chosen PSU giving a total of 312 SSUs for the  
11 whole country. The list of households with unique identification number developed from a  
12 recent listing of households was used as the sampling frame for the third stage. From each  
13 selected SSU, 30 households were chosen using a systematic random sampling method. In  
14 this sampling method, the elements to be included in the sample are selected based on a  
15 systematic rule, using a fixed sampling interval obtained by dividing population size by  
16 required sample size.<sup>21</sup> In the 4<sup>th</sup> stage, recruitment of one eligible participant aged between  
17 25 and 64 years was done from the selected household. The Kish sampling method was used  
18 to rank the eligible participants in each household in order of decreasing age, starting with  
19 males then females, and randomly selected using the automated program for Kish selection in  
20 the handheld PDA (Personal Digital Assistant).<sup>20</sup>  
21  
22

23  
24 The study population comprises 25 to 64 years old men and women residing in both urban  
25 and rural areas. The following exclusion criteria were used: individuals with a mental or  
26 physical illness deemed too ill to participate, institutionalized people (Buddhist monks and  
27 nuns, armed forces, hospitalized patients, prisoners), and temporary residents (living in a  
28 locality for less than 6 months).  
29  
30

31  
32 Altogether, a total of 8,757 men and women aged 25-64 years, residing in both urban and  
33 rural areas, participated in the survey. The response rates were 94% for the questionnaire,  
34 91% for physical measurements, and 90% for biochemical measurements. The final sample  
35 for the current study included 8,390 adults who participated in both STEP 1 and STEP 2,  
36 excluding 87 women who were currently pregnant, and 280 individuals with missing BMI.  
37  
38

### 39 **Data collection and measurements**

40  
41 The STEPS Instrument covers the following three different levels of "STEPS" of risk factor  
42 assessment. STEP (1) questionnaire survey; STEP (2) physical measurement; STEP (3)  
43 biochemical measurements. In the present study, we included variables from STEP 1 and  
44 STEP 2.  
45  
46  
47  
48  
49  
50  
51  
52  
53  
54  
55  
56  
57  
58  
59  
60

1  
2  
3 Eighteen trained teams (containing six members in each) collected the data. The English  
4 WHO STEPS Instrument (core and expanded) questionnaire version 3.0 was translated into  
5 the Myanmar version for the survey. A five-day training was conducted at University of  
6 Medicine (2), Yangon. The data collection teams conducted a pilot survey of all steps of data  
7 collection in the wards of North Okkalapa Township, Yangon on the fifth day of the training.  
8 Data for STEP 1 and 2 were collected at the survey participant's household during the first  
9 visit. Face to face interviews were conducted to collect information on sociodemographic  
10 factors and behavioural risk factors.  
11  
12

13  
14  
15  
16  
17 A Seca 217 portable stadiometer was used to measure body height without footwear and any  
18 hat or hair ties. Findings were recorded in centimetre (cm) to the nearest 0.1 cm. Body weight  
19 was measured with a pre-calibrated portable Seca Digital Floor Scale with High Capacity  
20 (Model 813) to the nearest 0.1 kilogram (kg). During weighing, the participants were  
21 requested to wear light clothing without footwear.<sup>20</sup> Waist and hip circumference  
22 measurement were done in a private area using a Seca 201 measuring tape. The waist  
23 circumference was measured in centimetres over light clothing at the midpoint between the  
24 last palpable rib and the top of the iliac crest. The hip circumference measurement was taken  
25 by placing the tape horizontally at maximum circumference over the buttocks. Measures were  
26 taken to the nearest 0.1 cm.<sup>20</sup>  
27  
28  
29  
30  
31  
32  
33  
34

### 35 **Variables**

#### 36 **BMI and W/H-ratio**

37  
38 BMI is the most widely used measure of general overweight and obesity<sup>22,23</sup> whereas W/H-  
39 ratio measures abdominal or central obesity and is a better predictor of CVD risk.<sup>24,25</sup>  
40 Therefore, we have included both measures in our study.  
41  
42  
43  
44  
45

46 BMI was calculated as weight in kilograms divided by the height in meters squared. Cut-off  
47 points for BMI were defined based on WHO recommendations: BMI of 25.0-29.9 kg/m<sup>2</sup> was  
48 considered overweight whereas having a BMI of 30 kg/m<sup>2</sup> or higher was considered obese.<sup>26</sup>  
49 For comparison, BMI was also classified according to Asian specific cut-off points: BMI of  
50 23.0-27.5 kg/m<sup>2</sup> (overweight) and BMI of  $\geq 27.5$  kg/m<sup>2</sup> (obesity).<sup>27</sup> W/H-ratio was defined as  
51 the ratio of the circumference of the waist to that of the hip. Central obesity was defined as a  
52 W/H-ratio above 0.90 for men and above 0.85 for women.<sup>28</sup>  
53  
54  
55  
56  
57  
58  
59  
60



### Urban-rural location

According to the ward or village tract administration law 2012, a ward is defined as an urban unit and a village is defined as a rural unit.<sup>29</sup> Hence, the same definition was used to define urban and rural areas in the current study.

### Sociodemographic factors

Age was defined as completed years of age. Education level was defined by both total number of years spent in school and by highest educational level obtained. It was categorized into seven categories: no formal schooling, less than primary school, primary school completed, secondary school completed, high school completed, college/university completed, and post graduate degree. In multivariable analyses, education level was collapsed into three groups: low level, medium level, and high level education. Low level was defined as education below primary school completion; Medium level: completion of primary and secondary school; High level: completion of high school, university, or post-graduate education.

Occupation was defined according to the main work status over the past 12 months and categorized as government employee, non-government employee, self-employed, nonpaid, student, homemaker, retired, unemployed (able to work), and unemployed (unable to work). In multivariable analyses, employment status was collapsed into two groups: employed and unemployed. Employed group included people who were government, non-government employee, self-employed, and homemakers. Nonpaid, student, retired, unemployed (both able and unable to work) were categorized in the unemployed group.

Daily personal income was calculated from the entire household income divided by the total number of household members excluding the household members under 18 years of age. Income was converted from Myanmar Kyats into United States Dollars (USD). Exchange rate of 1 USD was 970 Myanmar Kyats as of 1<sup>st</sup> September 2014.<sup>30</sup> Cut-off values for poverty line was used as defined by World Bank: 1.90 USD/day.<sup>31</sup>

### Statistical methods

Statistical analysis was performed in the Statistical Package for Social Sciences (SPSS) version 26.0 (Armonk, NY: IBM Corp). The characteristics of the study participants were presented in the form of frequency (N) and percentages (%) for categorical variables, and mean with standard deviation (SD) for continuous variables. Differences in categorical variables were tested using the chi-square test of Fischer exact test, whereas differences in the

1  
2  
3 mean for continuous variables were tested using two tailed t-tests. Linear regression was used  
4 to estimate the association between the urban-rural location and socioeconomic factors  
5 variables (income, education, and employment status) with continuous outcomes (BMI and  
6 W/H-ratio), obtaining betas ( $\beta$ ) with 95% confidence intervals (CIs). Potential multi-  
7 collinearity between variables was assessed with variance inflation factors (VIF). A VIF value  
8 greater than 10 was considered an indication of multi-collinearity; however, no significant  
9 multi-collinearity was observed. For all statistical analysis, the two-tailed significance level  
10 was set to 0.05.  
11  
12

13  
14  
15  
16  
17 Based on previous literature and construction of Directed Acyclic Graphs (DAGs),<sup>32</sup> we  
18 identified potential confounders and mediators (See Supplementary Figure 1). For objective 1,  
19 for associations of urban-rural location with BMI and W/H-ratio, age and gender were  
20 identified as confounders (See Supplementary Figure 1:A), and they were therefore included  
21 in multivariable models to obtain the total effect of urban-rural location on BMI (model 2,  
22 Table 2) and W/H-ratio (model 2, Table 3).  
23  
24

25  
26  
27  
28 For the second objective, for the association of socioeconomic characteristics (income,  
29 education, and employment status) with BMI (Table 2) and W/H-ratio (Table 3), we  
30 constructed three different DAGs (See Supplementary Figure 1: B, C, and D) for confounder  
31 adjustments.  
32  
33

34  
35  
36 To study the statistical effect of the SES variables (income, education, and employment  
37 status) together, the variables were assigned SES values (0/1) and a composite SES score was  
38 calculated. Participants with earnings above poverty line, high education attainment (binary)  
39 and employment were assigned SES value=1 and the lower category was assigned SES  
40 value=0. Total SES score for each participant was obtained by summing up values and total  
41 SES score was further categorized into three SES groups: low (total SES score=0), medium  
42 (total SES score=1 and 2), and high (total SES score=3) (See Supplementary Table 1). We  
43 assessed the association between SES groups and BMI (Table 2) or W/H-ratio (Table 3) with  
44 adjustment for confounders (age, gender, and urban-rural location).  
45  
46

47  
48  
49  
50  
51  
52 The third objective exploited whether the potential association between urban-rural location  
53 and BMI or W/H-ratio was mediated through socioeconomic characteristics (Table 4). We  
54 included the potential mediators income, education, employment, and the composite SES  
55 score variable one by one in order to obtain the direct effect of urban-rural location on BMI  
56 and W/H-ratio, and the proportion mediated through each of the socioeconomic factors.  
57  
58  
59  
60

## Ethics

Informed consent was obtained from the study participants; all information was handled with strict confidentiality. The participants were informed about the purpose and procedures of the study. Ethical approvals were obtained from the Norwegian Regional Committees for Medical and Health Research Ethics (REK) (Reference no. REK 2016/379) and the Ethical Review Committee of Department of Medical Research (Myanmar).

## Patient and Public Involvement

No patients or public were involved in setting the research question or the outcome measures, nor were they involved in the design and implementation of the study.

## RESULTS

The mean age of the study participants was 44.9 years, with rural participants being slightly younger than urban participants (Table 1). Nearly three quarters of the participants (68.6%), were from rural areas (not shown in tables). The mean length of education was 7.7 years in urban areas and 4.8 years in rural areas. In urban areas, the majority had primary education only (31.9%), 6.6% had no formal schooling, and 42.7% were self-employed (Table 1). In the rural areas, 39.6% had primary education only, 18.8% had no formal schooling, and 68.6% were self-employed. The proportion living on <1.9 USD/day was 4.9% in urban areas and 17.5% in rural areas. The prevalence of overweight (WHO standard cut-off: BMI 25-29.9) and obesity (WHO standard cut-off: BMI  $\geq$ 30) was 20.4% and 6.5% respectively (not shown in tables). The prevalence of overweight (Asian cut-off: BMI 23-27.4 kg/m<sup>2</sup>) was higher in women in urban areas (35.4%) in comparison to women in rural areas (28.4%) (Figure 1). Similarly, the prevalence of obesity (Asian cut-off: BMI  $\geq$ 27.5 kg/m<sup>2</sup>) was higher in urban women (27.9%), compared to rural women (12.7%) (Figure 1).

Table 1: Characteristics of 25-64 years old residents in Myanmar, by gender and urban-rural location

| Variables                            | Total<br>(n=8390)<br>N (%) | Urban                    |                             |                            | Rural                     |                             |                            |
|--------------------------------------|----------------------------|--------------------------|-----------------------------|----------------------------|---------------------------|-----------------------------|----------------------------|
|                                      |                            | Male<br>(n=830)<br>N (%) | Female<br>(n=1798)<br>N (%) | Total<br>(n=2628)<br>N (%) | Male<br>(n=2117)<br>N (%) | Female<br>(n=3645)<br>N (%) | Total<br>(n=5762)<br>N (%) |
| <b>Age (Mean years ± SD)</b>         | 44.9 ± 10.7                | 47.0 ± 10.8              | 46.0 ± 10.3                 | 46.4 ± 10.4                | 44.1 ± 10.9               | 44.4 ± 10.7                 | 44.2 ± 10.8                |
| <b>Age group (years)</b>             |                            |                          |                             |                            |                           |                             |                            |
| 25-34                                | 1689 (20.1)                | 139 (16.7)               | 272 (15.1)                  | 411 (15.6)                 | 488 (23.1)                | 790 (21.7)                  | 1278 (22.2)                |
| 35-44                                | 2315 (27.6)                | 178 (21.4)               | 511 (28.4)                  | 689 (26.2)                 | 577 (27.3)                | 1049 (28.8)                 | 1626 (28.2)                |
| 45-54                                | 2412 (28.7)                | 269 (32.4)               | 558 (31.0)                  | 827 (31.5)                 | 580 (27.4)                | 1005 (27.6)                 | 1585 (27.5)                |
| 55-64                                | 1974 (23.5)                | 244 (29.4)               | 457 (25.4)                  | 701 (26.7)                 | 472 (22.3)                | 801 (22.0)                  | 1273 (22.1)                |
| <b>Education (Mean Years ± SD)</b>   | 5.7 ± 4.1                  | 8.4 ± 3.9                | 7.5 ± 4.2                   | 7.7 ± 4.1                  | 5.3 ± 3.4                 | 4.5 ± 3.8                   | 4.8 ± 3.7                  |
| <b>Education level</b>               |                            |                          |                             |                            |                           |                             |                            |
| No formal School                     | 1256 (15.0)                | 51 (6.1)                 | 122 (6.8)                   | 173 (6.6)                  | 370 (17.5)                | 713 (19.6)                  | 1083 (18.8)                |
| Less than Primary School             | 1912 (22.8)                | 66 (8.0)                 | 293 (16.3)                  | 359 (13.7)                 | 434 (20.5)                | 1119 (30.7)                 | 1553 (27.0)                |
| Primary School completed             | 3121 (37.2)                | 265 (31.9)               | 574 (31.9)                  | 839 (31.9)                 | 933 (44.1)                | 1349 (37.0)                 | 2282 (39.6)                |
| Secondary School completed           | 1044 (12.4)                | 214 (25.8)               | 349 (19.4)                  | 563 (21.4)                 | 239 (11.3)                | 242 (6.6)                   | 481 (8.3)                  |
| High School completed                | 524 (6.2)                  | 117 (14.1)               | 203 (11.3)                  | 320 (12.2)                 | 86 (4.1)                  | 118 (3.2)                   | 204 (3.5)                  |
| College/university completed         | 499 (5.9)                  | 110 (13.3)               | 241 (13.4)                  | 351 (13.4)                 | 53 (2.5)                  | 95 (2.6)                    | 148 (2.6)                  |
| Post graduate degree                 | 34 (0.4)                   | 7 (0.8)                  | 16 (0.9)                    | 23 (0.9)                   | 2 (0.1)                   | 9 (0.2)                     | 11 (0.2)                   |
| <b>Employment Status</b>             |                            |                          |                             |                            |                           |                             |                            |
| Government Employee                  | 359 (4.3)                  | 81 (9.8)                 | 120 (6.7)                   | 201 (7.6)                  | 59 (2.8)                  | 99 (2.7)                    | 158 (2.7)                  |
| Non-Government Employee              | 560 (6.7)                  | 88 (10.6)                | 78 (4.3)                    | 166 (6.3)                  | 182 (8.6)                 | 212 (5.8)                   | 394 (6.8)                  |
| Self-employed                        | 5074 (60.5)                | 495 (59.6)               | 628 (34.9)                  | 1123 (42.7)                | 1667 (78.7)               | 2284 (62.7)                 | 3951 (68.6)                |
| Nonpaid                              | 210 (2.5)                  | 36 (4.3)                 | 28 (1.6)                    | 64 (2.4)                   | 59 (2.8)                  | 87 (2.4)                    | 146 (2.5)                  |
| Student                              | 8 (0.1)                    | 3 (0.4)                  | 0 (0.0)                     | 3 (0.1)                    | 2 (0.1)                   | 3 (0.1)                     | 5 (0.1)                    |
| Homemaker                            | 1559 (18.6)                | 6 (0.7)                  | 811 (45.1)                  | 817 (31.1)                 | 7 (0.3)                   | 735 (20.2)                  | 742 (12.9)                 |
| Retired                              | 174 (2.1)                  | 61 (7.3)                 | 38 (2.1)                    | 99 (3.8)                   | 44 (2.1)                  | 31 (0.9)                    | 75 (1.3)                   |
| Unemployed (able to work)            | 298 (3.6)                  | 47 (5.7)                 | 70 (3.9)                    | 117 (4.5)                  | 59 (2.8)                  | 122 (3.3)                   | 181 (3.1)                  |
| Unemployed (unable to work)          | 144 (1.7)                  | 13 (1.6)                 | 24 (1.3)                    | 37 (1.4)                   | 38 (1.8)                  | 69 (1.9)                    | 107 (1.9)                  |
| Refused to answer                    | 4 (0.0)                    | 0 (0.0)                  | 1 (0.1)                     | 1 (0.0)                    | 0 (0.0)                   | 3 (0.1)                     | 3 (0.1)                    |
| <b>Daily Income USD/day (n=7408)</b> |                            |                          |                             |                            |                           |                             |                            |
| < 1.9                                | 992 (13.4)                 | 38 (5.0)                 | 79 (4.8)                    | 117 (4.9)                  | 316 (17.0)                | 559 (17.8)                  | 875 (17.5)                 |
| ≥ 1.9                                | 6416 (86.6)                | 727 (95.0)               | 1559 (95.2)                 | 2286 (95.1)                | 1540 (83.0)               | 2590 (82.2)                 | 4130 (82.5)                |

SD, Standard deviation; USD, United States Dollar

### Objective 1: Association between urban-rural location and BMI or W/H-ratio

The mean BMI was higher among urban than rural residents ( $\beta=2.49$  kg/m<sup>2</sup>; 95% CI 2.28, 2.70;  $p<0.001$ ) when adjusting for age and gender (model 2, Table 2). Similarly, a greater W/H-ratio was observed in participants living in an urban area ( $\beta=0.015$ ; 95% CI 0.011, 0.020;  $p<0.001$ ) compared to rural, when adjusting for age and gender (model 2, Table 3).

Table 2: Mean Body mass index (BMI) and associations between urban-rural location (objective 1) and socioeconomic factors (objective 2) with BMI (kg/m<sup>2</sup>) among 25-64 years old Myanmar residents, Crude (Model 1) and adjusted for confounders (Model 2). Confounders are specified in footnotes.

| Variables                     | Category      | Mean<br>BMI ± SD | Model 1            | Model 2                         |
|-------------------------------|---------------|------------------|--------------------|---------------------------------|
|                               |               |                  | β (95% CI)         | β (95% CI)                      |
| <b>Location</b>               | Rural         | 21.9 ± 4.1       | Ref.               | Ref.                            |
|                               | Urban         | 24.5 ± 5.5       | 2.62** (2.40-2.83) | 2.49a** (2.28-2.70)             |
| <b>Income<sup>1</sup></b>     | < 1.9 USD/day | 21.5 ± 4.1       | Ref.               | Ref.                            |
|                               | ≥ 1.9 USD/day | 22.9 ± 4.8       | 1.44** (1.12-1.76) | 0.74b** (0.43-1.05)             |
| <b>Education</b>              | Low           | 21.9 ± 4.2       | Ref.               | Ref.                            |
|                               | Medium        | 22.9 ± 4.8       | 0.98** (0.76-1.21) | 0.88c** (0.66-1.10)             |
|                               | High          | 24.2 ± 5.7       | 2.28** (1.95-2.61) | 1.48c** (1.13-1.82)             |
| <b>Employment<sup>2</sup></b> | Employed      | 22.7 ± 4.7       | Ref.               | Ref.                            |
|                               | Unemployed    | 22.7 ± 5.1       | 0.04 (-0.30-0.38)  | -0.06 <sup>d</sup> (-0.39-0.26) |
| <b>SES</b>                    | Low           | 21.4 ± 4.0       | Ref.               | Ref.                            |
|                               | Medium        | 22.9 ± 4.8       | 1.42** (1.09-1.76) | 0.81c** (0.49-1.14)             |
|                               | High          | 24.1 ± 4.8       | 2.65** (1.54-3.77) | 1.28c* (0.21-2.36)              |

\*\*p<0.001, \*p<0.05, <sup>1</sup>982 participants with missing value for income excluded in all models; <sup>2</sup>4 participants with missing employment status excluded in all models; BMI, Body mass index; CI, Confidence interval; Ref., reference category; SD, Standard Deviation; SES, Socioeconomic Status

a) adjusted for age and gender

b) adjusted for age, gender, urban-rural location, education, and employment

c) adjusted for age, gender, and urban-rural location

d) adjusted for age, gender, urban-rural location, and education

Table 3: Mean Waist-hip ratio (W/H-ratio) and associations between urban-rural location (objective 1) and socioeconomic factors (objective 2) with W/H-ratio among 25-64 years old Myanmar residents, crude (Model 1) and adjusted for confounders (Model 2). Confounders are specified in footnotes.

| Variables                     | Category      | Mean<br>W/H-ratio<br>± SD | Model 1                | Model 2                           |
|-------------------------------|---------------|---------------------------|------------------------|-----------------------------------|
|                               |               |                           | β (95% CI)             | β (95% CI)                        |
| <b>Location</b>               | Rural         | 0.84 ± 0.09               | Ref.                   | Ref.                              |
|                               | Urban         | 0.86 ± 0.11               | 0.016*** (0.012-0.021) | 0.015a*** (0.011-0.020)           |
| <b>Income<sup>1</sup></b>     | < 1.9 USD/day | 0.84 ± 0.07               | Ref.                   | Ref.                              |
|                               | ≥ 1.9 USD/day | 0.85 ± 0.09               | 0.010* (0.004-0.016)   | 0.007* <sup>b</sup> (0.001-0.013) |
| <b>Education</b>              | Low           | 0.84 ± 0.08               | Ref.                   | Ref.                              |
|                               | Medium        | 0.85 ± 0.10               | 0.005* (0.00-0.009)    | 0.002 <sup>c</sup> (-0.003-0.006) |
|                               | High          | 0.85 ± 0.11               | 0.006 (-0.001-0.013)   | 0.002 <sup>c</sup> (-0.006-0.009) |
| <b>Employment<sup>2</sup></b> | Employed      | 0.85 ± 0.09               | Ref.                   | Ref.                              |
|                               | Unemployed    | 0.86 ± 0.10               | 0.018*** (0.011-0.025) | 0.006 <sup>d</sup> (-0.001-0.014) |
| <b>SES</b>                    | Low           | 0.84 ± 0.07               | Ref.                   | Ref.                              |
|                               | Medium        | 0.85 ± 0.09               | 0.012** (0.005-0.018)  | 0.008 <sup>c*</sup> (0.001-0.014) |
|                               | High          | 0.88 ± 0.19               | 0.044*** (0.022-0.066) | 0.019 <sup>c</sup> (-0.002-0.040) |

\*\*\*p<0.001, \*\*p<0.01, \*p<0.05; 7 participants with missing W/H-ratio excluded in all models; <sup>1</sup>982 participants with missing value for income excluded in all models; <sup>2</sup>4 participants with missing employment status excluded in all models; CI, Confidence interval; Ref., Reference category; SD, Standard Deviation; SES, Socioeconomic Status; W/H-ratio, Waist-hip ratio

a) adjusted for age and gender

b) adjusted for age, gender, urban-rural location, education, and employment

c) adjusted for age, gender, and urban-rural location

d) adjusted for age, gender, urban-rural location, and education

## Objective 2: Association between socioeconomic factors (income, education, and employment status) and BMI or W/H-ratio

The socioeconomic factors income and education but not employment, were associated with BMI (model 2, Table 2). Mean BMI was higher among individuals living above poverty line ( $\beta=0.74$  kg/m<sup>2</sup>; 95% CI 0.43, 1.05; p<0.001), versus below, when adjusting for age, gender, urban-rural location, education, and employment. BMI was higher among individuals with medium and high education, versus low (Medium education:  $\beta=0.88$  kg/m<sup>2</sup>; 95% CI 0.66, 1.10; p<0.001 and High education:  $\beta=1.48$  kg/m<sup>2</sup>; 95% CI 1.13, 1.82; p<0.001). Moreover, BMI was higher in medium and high SES group, versus low (Medium SES:  $\beta=0.81$  kg/m<sup>2</sup>; 95% CI 0.49, 1.14; p<0.001 and High SES:  $\beta=1.28$  kg/m<sup>2</sup>; 95% CI 0.21, 2.36; p<0.05) (Table 2).

1  
2  
3 There was an association between the socioeconomic indicators income and employment but  
4 not education, with W/H-ratio (model 2, Table 3). Among those with earnings  $\geq 1.9$  USD/day,  
5 the W/H-ratio was greater ( $\beta=0.007$ ; 95% CI 0.001, 0.013;  $p<0.05$ ) than those earning  $<1.9$   
6 USD/day. Unemployed participants had greater W/H-ratio than employed participants in the  
7 crude model, but the association was attenuated in the adjusted model (model 1, Table 3). In  
8 addition, medium and high SES groups had greater W/H-ratios than the low SES group in the  
9 crude model (model 1, Table 3).  
10  
11  
12  
13  
14

15  
16 When combining income, education, and employment status into a composite SES score, the  
17 prevalence of overweight (BMI 25-29.9) and obesity (BMI  $\geq 30$ ) increased with increasing  
18 SES score for both genders (Figure 2). Similarly, the prevalence of central obesity (W/H-ratio  
19  $>0.9$  for men and W/H-ratio  $>0.85$  for women) increased with increasing SES score in men,  
20 whereas in women the prevalence was almost similar in medium and high SES group (Figure  
21 2).  
22  
23  
24  
25

### 26 27 **Objective 3: Association between urban-rural location and BMI or W/H-ratio mediated** 28 **by socioeconomic factors (income, education, and employment status)** 29

30  
31 Table 4 shows the adjusted total- and direct effects of urban-rural location on BMI and W/H-  
32 ratio. There was change in the estimates for BMI after adjusting for income (Table 4), which  
33 gave an indirect effect of urban-rural location through income:  $2.50-2.08=0.42$  kg/m<sup>2</sup>, and a  
34 mediated proportion of 17% ( $0.42/2.50=0.17$ ). Similarly, adjusting for education gave an  
35 indirect effect of urban-rural location through education of 0.40 kg/m<sup>2</sup>, and a mediated  
36 proportion of 16%. When adjusting for employment, corresponding figures were 0.40 kg/m<sup>2</sup>  
37 and mediated proportion of 16%. Adjustment for the composite SES score gave an indirect  
38 effect of urban-rural location through composite SES score of 0.22 kg/m<sup>2</sup>, and a mediated  
39 proportion of 9%. There was change in the estimates for W/H-ratio after adjusting for income,  
40 which gave an indirect effect of urban-rural location through income of 0.002, and a mediated  
41 proportion of 12%. Similarly, adjusting for education gave an indirect effect of urban-rural  
42 location through education of 0.001, and a mediated proportion of 6%, and when adjusting for  
43 employment: 0.001 (mediated proportion of 6%) (Table 4). Furthermore, adjusting for  
44 composite SES score gave an indirect effect of urban-rural location through composite SES  
45 score of 0.002, and a mediated proportion of 12%.  
46  
47  
48  
49  
50  
51  
52  
53  
54  
55  
56  
57  
58  
59  
60

Table 4: Total- versus direct effect of urban-rural location on BMI and W/H-ratio (objective 3), among 25-64 years old Myanmar residents

| Location | BMI                  |                                               |                                  |                                     |                                      | W/H-ratio <sup>1</sup>  |                                               |                                  |                                     |                                      |
|----------|----------------------|-----------------------------------------------|----------------------------------|-------------------------------------|--------------------------------------|-------------------------|-----------------------------------------------|----------------------------------|-------------------------------------|--------------------------------------|
|          | Total effect (a)     | Direct effect through composite SES score (b) | Direct effect through income (c) | Direct effect through education (d) | Direct effect through employment (e) | Total effect (a)        | Direct effect through composite SES score (b) | Direct effect through income (c) | Direct effect through education (d) | Direct effect through employment (e) |
|          | $\beta$ (95% CI)     | $\beta$ (95% CI)                              | $\beta$ (95% CI)                 | $\beta$ (95% CI)                    | $\beta$ (95% CI)                     | $\beta$ (95% CI)        | $\beta$ (95% CI)                              | $\beta$ (95% CI)                 | $\beta$ (95% CI)                    | $\beta$ (95% CI)                     |
| Rural    | Ref.                 | Ref.                                          | Ref.                             | Ref.                                | Ref.                                 | Ref.                    | Ref.                                          | Ref.                             | Ref.                                | Ref.                                 |
| Urban    | 2.50*<br>(2.27-2.72) | 2.28*<br>(2.05-2.51)                          | 2.08*<br>(1.85-2.32)             | 2.10*<br>(1.86-2.33)                | 2.10*<br>(1.86-2.34)                 | 0.017*<br>(0.012-0.021) | 0.015*<br>(0.010-0.019)                       | 0.015*<br>(0.010-0.020)          | 0.016*<br>(0.011-0.021)             | 0.016*<br>(0.011-0.021)              |

\* $p < 0.001$ ; 982 participants with missing value for income and 4 participants with missing employment status excluded in all models for comparison; 17 participants with missing W/H-ratio excluded. Exclusion of missing values gives slightly different total estimates from Table 1; BMI, Body mass index; CI, Confidence interval; Ref., Reference category; W/H-ratio, Waist-hip ratio.

- (a) adjusted for age and gender (confounders)
- (b) adjusted for age, gender, and composite SES score
- (c) adjusted for age, gender, education, employment, and income
- (d) adjusted for age, gender, and education
- (e) adjusted for age, gender, education, and employment



## DISCUSSION

We found the prevalence of overweight and obesity, including central obesity to be higher in urban areas in Myanmar compared to rural areas. There was a consistent positive adjusted association between SES and BMI, while the association between SES and W/H-ratio was less consistent. Out of the socioeconomic factors, education was found to have the strongest association with BMI (general overweight and obesity), whereas income had the strongest association with W/H-ratio (central obesity). The association between urban-rural location and BMI was found to be partially mediated by the SES indicators with income, education, and employment status contributing almost equally. In the association between urban-rural location and W/H-ratio, the highest proportion was mediated by income.

A previous study from Myanmar report an 28% overall prevalence of overweight and 13% prevalence of obesity, which is higher than in the current study.<sup>18</sup> The higher prevalence could be due to the inclusion of adult women only and the use of Asian specific BMI cut-offs. However, our findings of a higher BMI and greater W/H-ratio in urban compared to rural areas corroborates previous studies conducted in Myanmar.<sup>14-16</sup> Further, it is also consistent with findings of studies carried out in other countries of the SEAR,<sup>33-37</sup> and of a global study conducted in 2010, which reported that the overall prevalence of overweight and obesity was higher in urban areas compared to their rural counterpart.<sup>38</sup> In contrast to our findings, a recent study composed of data from 2,009 population-based studies showed that BMI is rising at the same proportion or faster in rural areas compared to urban in LMICs except women in sub-Saharan Africa.<sup>12</sup> Similar study reported that mean BMI was generally higher in rural compared to urban men in South Asia while BMI increased at a similar rate in rural and urban men in East and Southeast Asia. The study also reported that changes in rural areas are driving the increase in mean BMI globally.<sup>12</sup> The authors suggested that improved road infrastructure and transportation has led to an increased access to high calorie foods, mechanized farming equipment, in addition to shifts from manual labour to more sedentary work,<sup>12</sup> i.e. an *urbanization* of the rural areas.

There is a paucity of studies investigating the association of all three socioeconomic factors (income, education, and employment status) with BMI and W/H-ratio in both male and female populations in Myanmar, hence the current study is the first to report these novel findings. In our study, higher income and higher education was associated with increased BMI, which is in accordance with a systematic review of studies investigating the association between SES and obesity in LMICs.<sup>6</sup> Additionally, a wide scale and much larger study

1  
2  
3 focusing on the association between socioeconomic factors and weight status across 53  
4 countries in 2010 found that the prevalence of obesity was highest in the richest quintile of the  
5 participants.<sup>38</sup> Another study from 70 low- middle- and high-income countries found a strong,  
6 positive association between individual income and obesity.<sup>39</sup> Furthermore, our result  
7  
8 correspond with evidence from a systematic review of studies<sup>40</sup> and a study involving non-  
9  
10 pregnant women from 37 developing countries,<sup>41</sup> which observed positive associations  
11  
12 between education and obesity in low income countries. Several studies from Bangladesh,  
13  
14 Nepal, India, and Sri Lanka also supports this.<sup>34-37,42</sup> Based on the Myanmar Demographic  
15  
16 and Health Survey 2015-2016, 28% of Myanmar's population is living in urban areas.<sup>43</sup>  
17  
18 However, Myanmar is still considered to be in the early phase of the demographic transition.  
19  
20 Much of the current development is happening in the cities,<sup>44</sup> which indicates that many of the  
21  
22 rural areas in Myanmar are not yet influenced by the ongoing urbanization of the country. The  
23  
24 economic growth in Myanmar, has reduced the proportion of people living below the poverty  
25  
26 line (a reduction in poverty from 48% to 25% between 2005 and 2017).<sup>45</sup> Because of the  
27  
28 continuing economic development of the country, there may be an increase in sedentary  
29  
30 lifestyle, higher income and more availability of processed food in urban areas, culminating to  
31  
32 an increased burden of overweight and obesity as diet and physical activity are its major risk  
33  
34 factors.<sup>46</sup> As rice is the main staple food of Myanmar, people generally consume high  
35  
36 amounts of carbohydrates, which in turn is associated with high BMI.<sup>47,48</sup> In urban Myanmar  
37  
38 residents, high intakes of fat and protein have been reported.<sup>49</sup> Moreover, the consumption of  
39  
40 fast food and high caloric soft drinks and alcohol is higher in urban inhabitants compared to  
41  
42 rural dwellers.<sup>48</sup> Additionally, in a study conducted in the Yangon region of Myanmar, the  
43  
44 prevalence of physical inactivity was low, and no difference was observed between urban and  
45  
46 rural residents.<sup>14</sup> However, most of the physical activity was linked to work, and high energy  
47  
48 expenditure in the workplace was higher among rural- than among urban residents.<sup>14</sup> There  
49  
50 may also be cultural determinants of BMI, as a larger body size often symbolizes high status  
51  
52 and good health in Myanmar, which means that people with a high SES may even prefer a  
53  
54 larger body size.<sup>48</sup> In LMICs, in general, high SES individuals have been found to have a  
55  
56 higher energy intake, reflecting a greater access to both inexpensive energy dense foods and  
57  
58 expensive higher-quality food items.<sup>50</sup>  
59

56 We found that the association between urban-rural location and BMI was only partially  
57 mediated by socioeconomic factors such as income, education, and employment status. Our  
58 finding is in line with a study conducted in women in reproductive age in 38 LMICs,  
59  
60

1  
2  
3 reporting that much, but not all of the urban-rural differences in BMI is driven by the  
4 socioeconomic composition (measured by household wealth).<sup>10</sup> This indicates that other  
5 important factors could explain the urban-rural BMI difference in Myanmar, including  
6 differences in non-leisure physical activity opportunities, less energy intensive occupation in  
7 urban areas, differences in neighbourhood environment, better transportation facilities, and  
8 better access to high ultra-processed and packaged food in urban areas.<sup>51-53</sup> Future prospective  
9 studies may be able to provide information that can explain this association. Road  
10 infrastructure and transportation facility is not well developed in the rural part of Myanmar.<sup>54</sup>  
11 As many as 40% of villages are without road access and additional 30% villages have access  
12 only part of the season, requiring the rural population to travel long distances to access  
13 markets and basic services leading to high energy expenditure.<sup>54</sup>  
14  
15  
16  
17  
18  
19  
20  
21  
22

### 23 Strengths and limitations

24  
25 The findings of this study add to the current research related to large population analyses of  
26 overweight and obesity. One of the major strengths of this study is the analyses of a large  
27 nationally representative sample of 8,390 participants that constitutes both urban and rural  
28 populations in Myanmar. In addition, the internationally recommended WHO STEPS protocol  
29 was diligently followed, and the outcome measures were assessed using standardised  
30 procedures. The response rate was high, at 91%. Moreover, we used W/H-ratio as the measure  
31 of central obesity in addition to BMI. There are, however, some limitations. The study was  
32 cross-sectional which means that causality cannot be determined, e.g. the temporal  
33 relationships between socioeconomic factors and obesity cannot be inferred; evidence  
34 suggests the relationship is likely to be bidirectional.<sup>55,56</sup> Furthermore, 982 participants  
35 refused to provide information on their income were excluded. These have a higher likelihood  
36 of belonging to lower income groups as most of them were unemployed, which may have  
37 given underestimation of socioeconomic differences in BMI. At the analysis stage, 280  
38 participants were excluded from the study due to missing BMI values. As association  
39 measures are robust, it is unlikely that this exclusion has substantially contributed to selection  
40 bias.<sup>57</sup> Institutionalized people like monks, nuns and soldiers were excluded from the  
41 sampling frame as their lifestyle may differ from most of the general population, which means  
42 that the findings can only be generalized to Myanmar's non-institutionalized population.  
43  
44  
45  
46  
47  
48  
49  
50  
51  
52  
53  
54  
55  
56  
57  
58  
59  
60

## CONCLUSION

The current study examines the relation between urban-rural location and socioeconomic factors with general- and central overweight and obesity in adult residents in Myanmar. Taken together, we found an independent and positive association between urban-rural location and BMI, partially, but not fully explained by socioeconomic factors. Mean BMI was higher among urban dwellers, individuals living above poverty line and in those with higher attained education level.

Knowledge about the significant roles played by location of living (urban and rural) and socioeconomic factors in relation to overweight and obesity can contribute to the development of well-targeted policies. Currently, mainly behavioural factors have been emphasised in prevention strategies for the management of overweight and obesity in Myanmar. Our findings imply that there should also be a focus on socioeconomic factors in order to reduce the burden of overweight and obesity. Moreover, updated national or sub-national STEPS surveys should be conducted to continue monitoring the trends and urban-rural differences in overweight and obesity.

### Footnotes

**Contributors:** RT contributed to the design of the article, statistical analysis, interpreted the data and drafted the manuscript. EB, CD, and WPA contributed to the conception and design of the study and the article, interpretation of the data and the content of the article. All authors contributed revising the manuscript for important intellectual content and approved the final version to be published.

**Funding:** The 2014 STEPS study was funded by the World Health Organization, the World Diabetes Foundation, and the report was printed with the financial assistance of the European Union and HelpAge International.

**Acknowledgments:** The authors acknowledge Professor, Tint Swe Latt, the principle investigator for the 2014 STEPS study. The authors are grateful to the World Health Organization, the University of Oslo and the Norwegian agency for Development Cooperation (Norad) for the project “Health and Sustainable development in Myanmar– Competence Building in Public Health and Medical Research and Education (MY-NORTH) Project: MMY-13/0049, NORHED, UiO:211782. We would like to thank all the participants, medical doctors from the Myanmar Medical Association, township medical officers, basic health staffs and local administrative authorities from all the surveyed areas.

1  
2  
3 **Competing interests:** No competing interests  
4

5 **Patient consent:** Obtained  
6

7  
8 **Data availability statement:** No additional data are available  
9

## 10 REFERENCES

- 11  
12 1. World Health Organization. Obesity and Overweight WHO; 2020 [Available from:  
13 <https://www.who.int/en/news-room/fact-sheets/detail/obesity-and-overweight> (accessed 18<sup>th</sup>  
14 May 2020).  
15  
16  
17  
18 2. Klein S, Allison DB, Heymsfield SB, et al. Waist Circumference and Cardiometabolic  
19 Risk: a Consensus Statement from Shaping America's Health: Association for Weight  
20 Management and Obesity Prevention; NAASO, the Obesity Society; the American Society for  
21 Nutrition; and the American Diabetes Association. *Obesity (Silver Spring, Md)*  
22 2007;15(5):1061-7. doi: 10.1038/oby.2007.632 [published Online First: 2007/05/15].  
23  
24  
25  
26  
27 3. Amato MC, Guarnotta V, Giordano C. Body composition assessment for the definition of  
28 cardiometabolic risk. *J Endocrinol Invest* 2013;36(7):537-43. doi: 10.3275/8943 [published  
29 Online First: 2013/04/25].  
30  
31  
32  
33 4. World Health Organization. Global Health Observatory Data Repository (South-East Asia  
34 Region): Prevalence of overweight among adults, BMI  $\geq$  25, crude Estimates by WHO  
35 Region 2016 [updated September 27, 2017]. Available from:  
36 <http://apps.who.int/gho/data/view.main-searo.BMI25CREGv?lang=en> (accessed 18<sup>th</sup> May  
37 2020).  
38  
39  
40  
41  
42 5. World Health Organization. Global Health Observatory Data Repository (South-East Asia  
43 Region): Prevalence of obesity among adults, BMI  $\geq$  30, crude Estimates by WHO region  
44 2016 [updated September 22, 2017]. Available from: [http://apps.who.int/gho/data/view.main-](http://apps.who.int/gho/data/view.main-searo.BMI30CREGv?lang=en)  
45 [searo.BMI30CREGv?lang=en](http://apps.who.int/gho/data/view.main-searo.BMI30CREGv?lang=en) (accessed 18<sup>th</sup> May 2020).  
46  
47  
48  
49 6. Dinsa GD, Goryakin Y, Fumagalli E, et al. Obesity and socioeconomic status in developing  
50 countries: a systematic review. *Obes Rev* 2012;13(11):1067-79. doi: 10.1111/j.1467-  
51 789X.2012.01017.x [published Online First: 2012/07/07].  
52  
53  
54  
55 7. Ford ND, Patel SA, Narayan KM. Obesity in Low- and Middle-Income Countries: Burden,  
56 Drivers, and Emerging Challenges. *Annu Rev Public Health* 2017;38:145-64. doi:  
57 10.1146/annurev-publhealth-031816-044604 [published Online First: 2017/01/10].  
58  
59  
60

- 1  
2  
3 8. Popkin BM, Adair LS, Ng SW. Global nutrition transition and the pandemic of obesity in  
4 developing countries. *Nutr Rev* 2012;70(1):3-21. doi: 10.1111/j.1753-4887.2011.00456.x  
5 [published Online First: 2012/01/10].  
6  
7
- 8  
9 9. United Nations. 2018 revision of world urbanization prospects: United Nations Department  
10 of Economic and Social Affairs, 2018.  
11
- 12  
13 10. Neuman M, Kawachi I, Gortmaker S, et al. Urban-rural differences in BMI in low- and  
14 middle-income countries: the role of socioeconomic status. *Am J Clin Nutr* 2013;97(2):428-  
15 36. doi: 10.3945/ajcn.112.045997 [published Online First: 2013/01/02].  
16  
17
- 18  
19 11. McLaren L. Socioeconomic status and obesity. *Epidemiol Rev* 2007;29(1):29-48. doi:  
20 10.1093/epirev/mxm001 [published Online First: 2007/05/05].  
21
- 22  
23 12. Bixby H, Bentham J, Zhou B, et al. Rising rural body-mass index is the main driver of the  
24 global obesity epidemic in adults. *Nature* 2019;569(7755):260-64. doi: 10.1038/s41586-019-  
25 1171-x [published Online First: 2019/05/10].  
26  
27
- 28  
29 13. World Health Organization. Myanmar (Yangon Division) STEPS Survey 2004 Fact Sheet  
30 2004 [Available from:  
31 [https://www.who.int/ncds/surveillance/steps/Myanmar\\_2004\\_FactSheet.pdf](https://www.who.int/ncds/surveillance/steps/Myanmar_2004_FactSheet.pdf) (accessed 23<sup>rd</sup>  
32 April 2019).  
33  
34
- 35  
36 14. Htet AS, Bjertness MB, Sherpa LY, et al. Urban-rural differences in the prevalence of  
37 non-communicable diseases risk factors among 25-74 years old citizens in Yangon Region,  
38 Myanmar: a cross sectional study. *BMC Public Health* 2016;16(1):1225. doi:  
39 10.1186/s12889-016-3882-3 [published Online First: 2016/12/07].  
40  
41
- 42  
43 15. World Health Organization. WHO STEPwise approach to NCD surveillance 2004,  
44 Myanmar Disaggregation of Urban and rural data (urban). Available from:  
45 <https://www.who.int/ncds/surveillance/steps/MyanmarSTEPSReport2004URBAN.pdf>  
46 (accessed 23<sup>rd</sup> April 2019).  
47  
48
- 49  
50 16. World Health Organization. WHO STEPwise approach to NCD surveillance 2004,  
51 Myanmar Disaggregation of Urban and rural data (rural). Available from:  
52 <https://www.who.int/ncds/surveillance/steps/MyanmarSTEPSReport2004RURAL.pdf>  
53 (accessed 23<sup>rd</sup> April 2019).  
54  
55
- 56  
57 17. World Health Organization. Noncommunicable Disease Risk Factor Survey Myanmar  
58 2009. 2011. [Available from:  
59  
60

1  
2  
3 [https://www.who.int/ncds/surveillance/steps/2009\\_STEPS\\_Survey\\_Myanmar.pdf](https://www.who.int/ncds/surveillance/steps/2009_STEPS_Survey_Myanmar.pdf) (accessed  
4 23<sup>rd</sup> April 2019).

5  
6  
7 18. Hong SA, Peltzer K, Lwin KT, et al. The prevalence of underweight, overweight and  
8 obesity and their related socio-demographic and lifestyle factors among adult women in  
9 Myanmar, 2015-16. *PLoS One* 2018;13(3):e0194454. doi: 10.1371/journal.pone.0194454  
10 [published Online First: 2018/03/17].

11  
12  
13  
14 19. Stokke K, Vakulchuk R, Øverland I. Myanmar: A political economy analysis. 2018.

15  
16  
17 20. World Health Organization. Report on National Survey of Diabetes Mellitus and Risk  
18 Factors for Non-Communicable Diseases in Myanmar (2014). 2018. Available from:  
19 [www.who.int/ncds/surveillance/steps/Myanmar\\_2014\\_STEPS\\_Report.pdf](http://www.who.int/ncds/surveillance/steps/Myanmar_2014_STEPS_Report.pdf) (accessed 23<sup>rd</sup>  
20 April 2019).

21  
22  
23  
24 21. Elfil M, Negida A. Sampling methods in Clinical Research; an Educational Review.  
25 *Emerg (Tehran)* 2017;5(1):e52-e52. [published Online First: 2017/01/14].

26  
27  
28 22. Colditz GA, Willett WC, Rotnitzky A, et al. Weight gain as a risk factor for clinical  
29 diabetes mellitus in women. *Ann Intern Med* 1995;122(7):481-6. doi: 10.7326/0003-4819-  
30 122-7-199504010-00001 [published Online First: 1995/04/01].

31  
32  
33  
34 23. Pajak A, Kuulasmaa K, Tuomilehto J, et al. Geographical variation in the major risk  
35 factors of coronary heart disease in men and women aged 35-64 years : the WHO MONICA  
36 Project / prepared by Andrzej Pajak ... [et al.]. *World health statistics quarterly*  
37 1988;41(3/4):115-140. <https://apps.who.int/iris/handle/10665/51270>

38  
39  
40  
41 24. Bigaard J, Frederiksen K, Tjønneland A, et al. Waist circumference and body composition  
42 in relation to all-cause mortality in middle-aged men and women. *Int J Obes (Lond)*  
43 2005;29(7):778-84. doi: 10.1038/sj.ijo.0802976 [published Online First: 2005/05/27].

44  
45  
46  
47 25. Janssen I, Katzmarzyk PT, Ross R. Waist circumference and not body mass index  
48 explains obesity-related health risk. *Am J Clin Nutr* 2004;79(3):379-84. doi:  
49 10.1093/ajcn/79.3.379 [published Online First: 2004/02/27].

50  
51  
52  
53 26. Lim JU, Lee JH, Kim JS, et al. Comparison of World Health Organization and Asia-  
54 Pacific body mass index classifications in COPD patients. *Int J Chron Obstruct Pulmon Dis*  
55 2017;12:2465-75. doi: 10.2147/COPD.S141295

- 1  
2  
3 27. WHO Expert Consultation. Appropriate body-mass index for Asian populations and its  
4 implications for policy and intervention strategies. *Lancet (London, England)*  
5 2004;363(9403):157.  
6  
7  
8  
9 28. World Health Organization. Waist circumference and waist-hip ratio: report of a WHO  
10 expert consultation, Geneva, 8-11 December 2008. 2011.  
11  
12  
13 29. The Republic of Union of Myanmar MoHA. The ward or village tract administration law  
14 2012 [Available from: [http://www.myanmar-law-library.org/law-library/laws-and-](http://www.myanmar-law-library.org/law-library/laws-and-regulations/laws/myanmar-laws-1988-until-now/union-solidarity-and-development-party-laws-2012-2016/myanmar-laws-2012/pyidaungsu-hluttaw-law-no-1-2012-ward-or-village-administration-law-burmese.html)  
15 [regulations/laws/myanmar-laws-1988-until-now/union-solidarity-and-development-party-](http://www.myanmar-law-library.org/law-library/laws-and-regulations/laws/myanmar-laws-1988-until-now/union-solidarity-and-development-party-laws-2012-2016/myanmar-laws-2012/pyidaungsu-hluttaw-law-no-1-2012-ward-or-village-administration-law-burmese.html)  
16 [laws-2012-2016/myanmar-laws-2012/pyidaungsu-hluttaw-law-no-1-2012-ward-or-village-](http://www.myanmar-law-library.org/law-library/laws-and-regulations/laws/myanmar-laws-1988-until-now/union-solidarity-and-development-party-laws-2012-2016/myanmar-laws-2012/pyidaungsu-hluttaw-law-no-1-2012-ward-or-village-administration-law-burmese.html)  
17 [administration-law-burmese.html](http://www.myanmar-law-library.org/law-library/laws-and-regulations/laws/myanmar-laws-1988-until-now/union-solidarity-and-development-party-laws-2012-2016/myanmar-laws-2012/pyidaungsu-hluttaw-law-no-1-2012-ward-or-village-administration-law-burmese.html) (accessed 20<sup>th</sup> October 2019).  
18  
19  
20  
21  
22 30. Central Bank of Myanmar. Reference exchange rate [Available from:  
23 <https://forex.cbm.gov.mm/index.php/fxrate> (accessed 20<sup>th</sup> August 2019).  
24  
25  
26 31. Ferreira FH, Chen S, Dabalen A, et al. A global count of the extreme poor in 2012: data  
27 issues, methodology and initial results: The World Bank 2015.  
28  
29  
30 32. Textor J, van der Zander B, Gilthorpe MS, et al. Robust causal inference using directed  
31 acyclic graphs: the R package 'dagitty'. *Int J Epidemiol* 2016;45(6):1887-94. doi:  
32 10.1093/ije/dyw341 [published Online First: 2017/01/17].  
33  
34  
35 33. Angkurawaranon C, Jiraporncharoen W, Chenthanakij B, et al. Urban environments and  
36 obesity in southeast Asia: a systematic review, meta-analysis and meta-regression. *PLoS One*  
37 2014;9(11):e113547. doi: 10.1371/journal.pone.0113547 [published Online First:  
38 2014/11/27].  
39  
40  
41  
42 34. Biswas T, Garnett SP, Pervin S, et al. The prevalence of underweight, overweight and  
43 obesity in Bangladeshi adults: Data from a national survey. *PLoS One* 2017;12(5):e0177395.  
44 doi: 10.1371/journal.pone.0177395  
45  
46  
47  
48 35. Siddiqui ST, Kandala N-B, Stranges S. Urbanisation and geographic variation of  
49 overweight and obesity in India: a cross-sectional analysis of the Indian Demographic Health  
50 Survey 2005–2006. *Int J Public Health* 2015;60(6):717-26.  
51  
52  
53  
54 36. Biswas T, Townsend N, Islam MS, et al. Association between socioeconomic status and  
55 prevalence of non-communicable diseases risk factors and comorbidities in Bangladesh:  
56 findings from a nationwide cross-sectional survey. *BMJ Open* 2019;9(3):e025538. doi:  
57 10.1136/bmjopen-2018-025538  
58  
59  
60



- 1  
2  
3 37. De Silva AP, De Silva SH, Haniffa R, et al. A cross sectional survey on social, cultural  
4 and economic determinants of obesity in a low middle income setting. *Int J Equity Health*  
5 2015;14(1):6. doi: 10.1186/s12939-015-0140-8 [published Online First: 2015/01/18].  
6  
7  
8  
9 38. Moore S, Hall JN, Harper S, et al. Global and national socioeconomic disparities in  
10 obesity, overweight, and underweight status. *J Obes* 2010;2010 doi: 10.1155/2010/514674  
11 [published Online First: 2010/08/20].  
12  
13  
14 39. Masood M, Reidpath DD. Effect of national wealth on BMI: An analysis of 206,266  
15 individuals in 70 low-, middle- and high-income countries. *PLoS One* 2017;12(6):e0178928.  
16 doi: 10.1371/journal.pone.0178928 [published Online First: 2017/07/01].  
17  
18  
19  
20 40. Cohen AK, Rai M, Rehkopf DH, et al. Educational attainment and obesity: a systematic  
21 review. *Obes Rev* 2013;14(12):989-1005. doi: 10.1111/obr.12062 [published Online First:  
22 2013/07/25].  
23  
24  
25  
26 41. Monteiro CA, Conde WL, Lu B, et al. Obesity and inequities in health in the developing  
27 world. *Int J Obes Relat Metab Disord* 2004;28(9):1181-86. doi: 10.1038/sj.jjo.0802716  
28 [published Online First: 2004/06/24].  
29  
30  
31  
32 42. Al Kibria GM. Prevalence and factors affecting underweight, overweight and obesity  
33 using Asian and World Health Organization cutoffs among adults in Nepal: Analysis of the  
34 Demographic and Health Survey 2016. *Obes Res Clin Pract* 2019;13(2):129-36. doi:  
35 <https://doi.org/10.1016/j.orcp.2019.01.006> [published Online First: 2019/02/06].  
36  
37  
38  
39 43. Health Mo, Sports - MoHS/Myanmar, ICF. Myanmar Demographic and Health Survey  
40 2015-16. Nay Pyi Taw, Myanmar: MoHS and ICF; 2017. Available from:  
41 <http://dhsprogram.com/pubs/pdf/FR324/FR324.pdf>  
42  
43  
44  
45 44. The World Bank. Myanmar's Urbanization: Creating Opportunities for All 2019.  
46 Available from: [https://www.worldbank.org/en/country/myanmar/publication/myanmars-](https://www.worldbank.org/en/country/myanmar/publication/myanmars-urbanization-creating-opportunities-for-all)  
47 [urbanization-creating-opportunities-for-all](https://www.worldbank.org/en/country/myanmar/publication/myanmars-urbanization-creating-opportunities-for-all) (accessed 28<sup>th</sup> August 2019).  
48  
49  
50  
51 45. The World Bank in Myanmar. Overview 2020. Available from:  
52 <https://www.worldbank.org/en/country/myanmar/overview> (accessed 11<sup>th</sup> June 2020).  
53  
54  
55  
56 46. International Food Policy Research Institute. Global food policy report 2017. Washington,  
57 DC: International Food Policy Research Institute (IFPRI) 2017. doi:  
58 <https://doi.org/10.2499/9780896292529>  
59  
60

- 1  
2  
3 47. Unwin D, Unwin J. Low carbohydrate diet to achieve weight loss and improve HbA1c in  
4 type 2 diabetes and pre-diabetes: experience from one general practice. *Practical Diabetes*  
5 2014;31(2):76-79. doi: 10.1002/pdi.1835  
6  
7  
8  
9 48. Aye T, Aung M, Oo E. Diabetes mellitus in Myanmar: Socio-cultural challenges and  
10 strength. *Journal of Social Health and Diabetes* 2018;02(01):009-13. doi: 10.4103/2321-  
11 0656.120255  
12  
13  
14 49. Hlaing HH, Liabsuetrakul T. Dietary intake, food pattern, and abnormal blood glucose  
15 status of middle-aged adults: a cross-sectional community-based study in Myanmar. *Food*  
16 *Nutr Res* 2016;60(1):28898. doi: 10.3402/fnr.v60.28898 [published Online First: 2016/05/07].  
17  
18  
19  
20 50. Mayen AL, Marques-Vidal P, Paccaud F, et al. Socioeconomic determinants of dietary  
21 patterns in low- and middle-income countries: a systematic review. *Am J Clin Nutr*  
22 2014;100(6):1520-31. doi: 10.3945/ajcn.114.089029 [published Online First: 2014/11/21].  
23  
24  
25  
26 51. Popkin BM. Technology, transport, globalization and the nutrition transition food policy.  
27 *Food Policy* 2006;31(6):554-69. doi: 10.1016/j.foodpol.2006.02.008  
28  
29  
30 52. Solomons NW, Gross R. Urban nutrition in developing countries. *Nutr Rev* 1995;53(4 Pt  
31 1):90-5. doi: 10.1111/j.1753-4887.1995.tb01526.x [published Online First: 1995/04/01].  
32  
33  
34 53. Mohammed SH, Habtewold TD, Birhanu MM, et al. Neighbourhood socioeconomic  
35 status and overweight/obesity: a systematic review and meta-analysis of epidemiological  
36 studies. *BMJ Open* 2019;9(11):e028238. doi: 10.1136/bmjopen-2018-028238 [published  
37 Online First: 2019/11/16].  
38  
39  
40  
41 54. Asian Development Bank. Myanmar Transport Sector Policy Note: Rural Roads and  
42 Access. 2016. Available from:  
43 <https://www.adb.org/sites/default/files/publication/189079/mya-rural-roads.pdf> (accessed 22<sup>nd</sup>  
44 April, 2020).  
45  
46  
47  
48 55. Kim TJ, von dem Knesebeck O. Income and obesity: what is the direction of the  
49 relationship? A systematic review and meta-analysis. *BMJ Open* 2018;8(1):e019862. doi:  
50 10.1136/bmjopen-2017-019862 [published Online First: 2018/01/08].  
51  
52  
53  
54 56. Kim TJ, Roesler NM, von dem Knesebeck O. Causation or selection - examining the  
55 relation between education and overweight/obesity in prospective observational studies: a  
56 meta-analysis. *Obes Rev* 2017;18(6):660-72. doi: 10.1111/obr.12537 [published Online First:  
57 2017/04/13].  
58  
59  
60

1  
2  
3 57. Sogaard AJ, Selmer R, Bjertness E, et al. The Oslo Health Study: The impact of self-  
4 selection in a large, population-based survey. *Int J Equity Health* 2004;3(1):3. doi:  
5 10.1186/1475-9276-3-3 [published Online First: 2004/05/07].  
6  
7

## 8 9 **Figures**

10  
11 Figure 1: Proportion of participants with high Body mass index (BMI) (above Asian  
12 overweight and obesity cut-off) and Waist-hip ratio (W/H-ratio), with 95% confidence  
13 interval, of 25-64 years old Myanmar residents by urban-rural location and gender  
14  
15

16  
17 Figure 2: Prevalence of overweight (BMI 25-29.9), obesity (BMI  $\geq 30$ ) and central obesity  
18 (W/H-ratio  $> 0.9$  for males and W/H-ratio  $> 0.85$  for females) across three levels of SES  
19 (calculated composite SES score) among 25-64 years old Myanmar residents, by gender  
20  
21  
22  
23  
24  
25  
26  
27  
28  
29  
30  
31  
32  
33  
34  
35  
36  
37  
38  
39  
40  
41  
42  
43  
44  
45  
46  
47  
48  
49  
50  
51  
52  
53  
54  
55  
56  
57  
58  
59  
60

Figure 1: Proportion of participants with high Body mass index (BMI) (above Asian overweight and obesity cut-off) and Waist-hip ratio (W/H-ratio), with 95% confidence interval, of 25-64 years old Myanmar residents by urban-rural location and gender

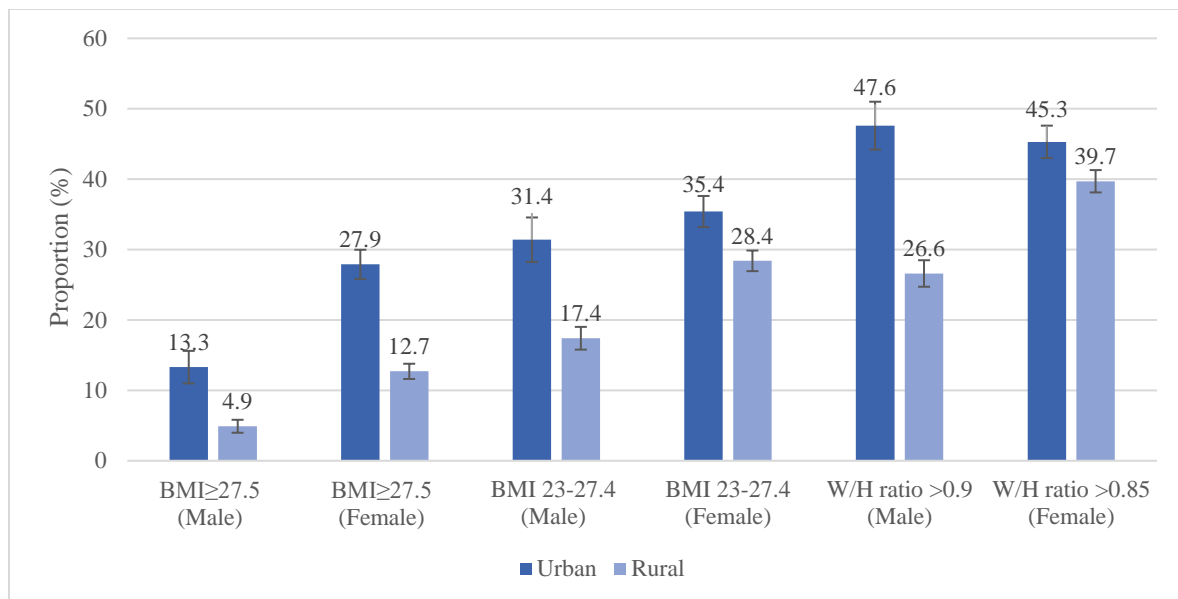

Figure 2: Prevalence of overweight (BMI 25-29.9), obesity (BMI  $\geq 30$ ) and central obesity (W/H-ratio  $>0.9$  for males and W/H-ratio  $>0.85$  for females) across three levels of SES (calculated composite SES score) among 25-64 years old Myanmar residents, by gender

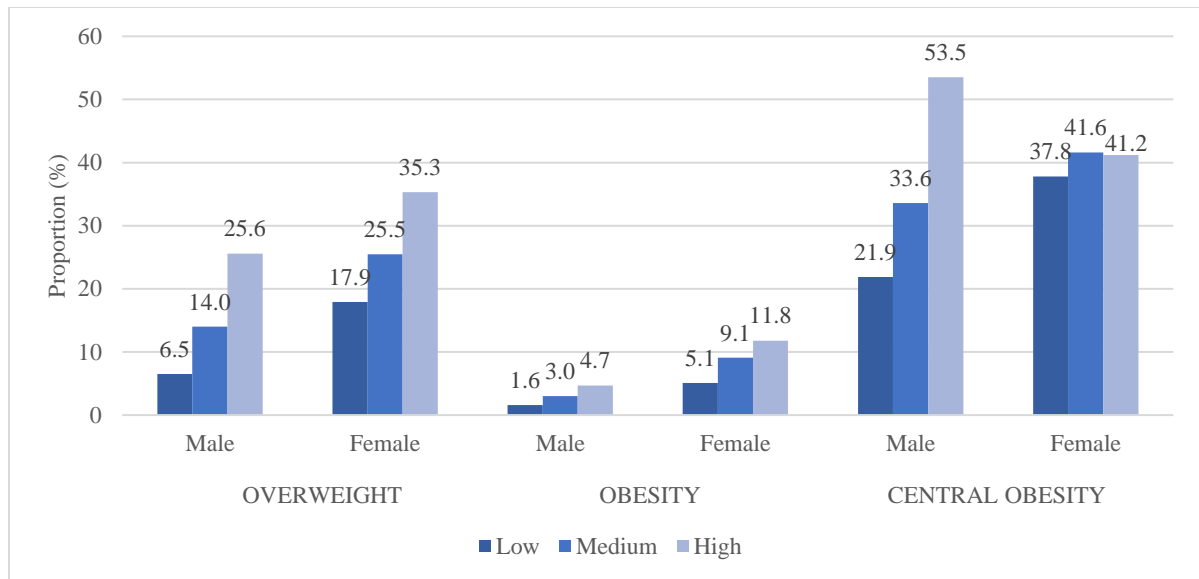

Supplementary Figure 1: DAGs for the casual relationship between exposure and outcome

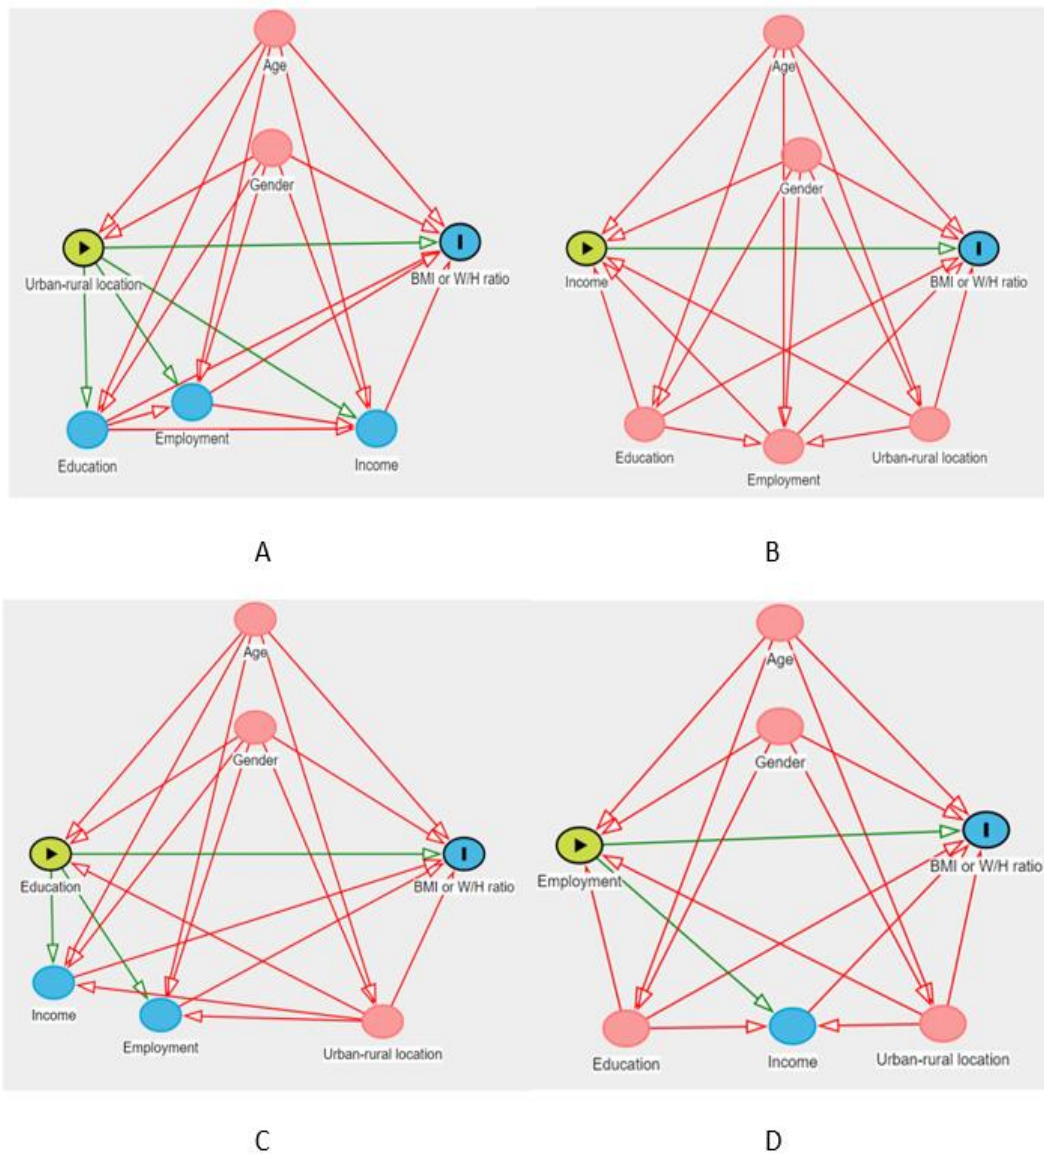

A: showing hypothesized causal relationships between urban-rural location and BMI or W/H-ratio, adjusted for age and gender

B: showing hypothesized causal relationships between income and BMI or W/H-ratio, adjusted for age, gender, urban-rural location, education, and employment

C: showing hypothesized causal relationships between education and BMI or W/H-ratio, adjusted for age, gender and urban-rural location

D: showing hypothesized causal relationships between employment and BMI or W/H-ratio, adjusted for age, gender, urban-rural location and education

Supplementary Table 1: Socioeconomic status (SES) score: description of the variable, calculation procedure, score range and SES groups

|                  | <b>Variables combined</b> | <b>Variables value</b>                               | <b>Score range</b> | <b>SES groups</b>                |
|------------------|---------------------------|------------------------------------------------------|--------------------|----------------------------------|
| <b>SES score</b> | Education                 | Low education= 0 (below high school completion)      | 0-3                | Low (Total SES score 0)          |
|                  |                           | High education= 1 (high school completion and above) |                    |                                  |
|                  | Income                    | Below poverty line= 0                                |                    | Medium (Total SES score 1 and 2) |
|                  |                           | Above poverty line= 1                                |                    |                                  |
|                  | Employment                | Unemployed= 0                                        |                    | High (Total SES score 3)         |
|                  |                           | Employed= 1                                          |                    |                                  |

**STROBE 2007 (v4) Statement—Checklist of items that should be included in reports of *cross-sectional studies***

| Section/Topic                | Item # | Recommendation                                                                                                                                                                       | Reported on page # |
|------------------------------|--------|--------------------------------------------------------------------------------------------------------------------------------------------------------------------------------------|--------------------|
| <b>Title and abstract</b>    | 1      | (a) Indicate the study's design with a commonly used term in the title or the abstract                                                                                               | 1                  |
|                              |        | (b) Provide in the abstract an informative and balanced summary of what was done and what was found                                                                                  | 1                  |
| <b>Introduction</b>          |        |                                                                                                                                                                                      |                    |
| Background/rationale         | 2      | Explain the scientific background and rationale for the investigation being reported                                                                                                 | 2-3                |
| Objectives                   | 3      | State specific objectives, including any prespecified hypotheses                                                                                                                     | 3                  |
| <b>Methods</b>               |        |                                                                                                                                                                                      |                    |
| Study design                 | 4      | Present key elements of study design early in the paper                                                                                                                              | 3                  |
| Setting                      | 5      | Describe the setting, locations, and relevant dates, including periods of recruitment, exposure, follow-up, and data collection                                                      | 3-5                |
| Participants                 | 6      | (a) Give the eligibility criteria, and the sources and methods of selection of participants                                                                                          | 3-4                |
| Variables                    | 7      | Clearly define all outcomes, exposures, predictors, potential confounders, and effect modifiers. Give diagnostic criteria, if applicable                                             | 5-7                |
| Data sources/<br>measurement | 8*     | For each variable of interest, give sources of data and details of methods of assessment (measurement). Describe comparability of assessment methods if there is more than one group | 5                  |
| Bias                         | 9      | Describe any efforts to address potential sources of bias                                                                                                                            | 7                  |
| Study size                   | 10     | Explain how the study size was arrived at                                                                                                                                            | 4                  |
| Quantitative variables       | 11     | Explain how quantitative variables were handled in the analyses. If applicable, describe which groupings were chosen and why                                                         | 6-7                |
| Statistical methods          | 12     | (a) Describe all statistical methods, including those used to control for confounding                                                                                                | 6-7                |
|                              |        | (b) Describe any methods used to examine subgroups and interactions                                                                                                                  |                    |
|                              |        | (c) Explain how missing data were addressed                                                                                                                                          | 10, 11, 13         |
|                              |        | (d) If applicable, describe analytical methods taking account of sampling strategy                                                                                                   |                    |
|                              |        | (e) Describe any sensitivity analyses                                                                                                                                                |                    |
| <b>Results</b>               |        |                                                                                                                                                                                      |                    |



|                          |     |                                                                                                                                                                                                                                                                                                                                                                                                               |            |
|--------------------------|-----|---------------------------------------------------------------------------------------------------------------------------------------------------------------------------------------------------------------------------------------------------------------------------------------------------------------------------------------------------------------------------------------------------------------|------------|
| Participants             | 13* | (a) Report numbers of individuals at each stage of study—eg numbers potentially eligible, examined for eligibility, confirmed eligible, included in the study, completing follow-up, and analysed<br>(b) Give reasons for non-participation at each stage<br>(c) Consider use of a flow diagram                                                                                                               | 4          |
| Descriptive data         | 14* | (a) Give characteristics of study participants (eg demographic, clinical, social) and information on exposures and potential confounders<br>(b) Indicate number of participants with missing data for each variable of interest                                                                                                                                                                               | 9<br>9     |
| Outcome data             | 15* | Report numbers of outcome events or summary measures                                                                                                                                                                                                                                                                                                                                                          | 5          |
| Main results             | 16  | (a) Give unadjusted estimates and, if applicable, confounder-adjusted estimates and their precision (eg, 95% confidence interval). Make clear which confounders were adjusted for and why they were included<br>(b) Report category boundaries when continuous variables were categorized<br>(c) If relevant, consider translating estimates of relative risk into absolute risk for a meaningful time period | 10-13<br>8 |
| Other analyses           | 17  | Report other analyses done—eg analyses of subgroups and interactions, and sensitivity analyses                                                                                                                                                                                                                                                                                                                | 13         |
| <b>Discussion</b>        |     |                                                                                                                                                                                                                                                                                                                                                                                                               |            |
| Key results              | 18  | Summarise key results with reference to study objectives                                                                                                                                                                                                                                                                                                                                                      | 14         |
| Limitations              | 19  | Discuss limitations of the study, taking into account sources of potential bias or imprecision. Discuss both direction and magnitude of any potential bias                                                                                                                                                                                                                                                    | 16         |
| Interpretation           | 20  | Give a cautious overall interpretation of results considering objectives, limitations, multiplicity of analyses, results from similar studies, and other relevant evidence                                                                                                                                                                                                                                    | 14-16      |
| Generalisability         | 21  | Discuss the generalisability (external validity) of the study results                                                                                                                                                                                                                                                                                                                                         | 16         |
| <b>Other information</b> |     |                                                                                                                                                                                                                                                                                                                                                                                                               |            |
| Funding                  | 22  | Give the source of funding and the role of the funders for the present study and, if applicable, for the original study on which the present article is based                                                                                                                                                                                                                                                 | 17         |

\*Give information separately for cases and controls in case-control studies and, if applicable, for exposed and unexposed groups in cohort and cross-sectional studies.

**Note:** An Explanation and Elaboration article discusses each checklist item and gives methodological background and published examples of transparent reporting. The STROBE checklist is best used in conjunction with this article (freely available on the Web sites of PLoS Medicine at <http://www.plosmedicine.org/>, Annals of Internal Medicine at <http://www.annals.org/>, and Epidemiology at <http://www.epidem.com/>). Information on the STROBE Initiative is available at [www.strobe-statement.org](http://www.strobe-statement.org).

# BMJ Open

## Urban-rural differences in overweight and obesity among 25-64 years old Myanmar residents: a cross-sectional, nationwide survey

|                                 |                                                                                                                                                                                                                                                                                                                                                                                                                                                                                                                                                                 |
|---------------------------------|-----------------------------------------------------------------------------------------------------------------------------------------------------------------------------------------------------------------------------------------------------------------------------------------------------------------------------------------------------------------------------------------------------------------------------------------------------------------------------------------------------------------------------------------------------------------|
| Journal:                        | <i>BMJ Open</i>                                                                                                                                                                                                                                                                                                                                                                                                                                                                                                                                                 |
| Manuscript ID                   | bmjopen-2020-042561.R1                                                                                                                                                                                                                                                                                                                                                                                                                                                                                                                                          |
| Article Type:                   | Original research                                                                                                                                                                                                                                                                                                                                                                                                                                                                                                                                               |
| Date Submitted by the Author:   | 04-Nov-2020                                                                                                                                                                                                                                                                                                                                                                                                                                                                                                                                                     |
| Complete List of Authors:       | Thapa, Rupa; University of Oslo Faculty of Medicine, Department of Community Medicine and Global Health<br>Dahl, Cecilie; University of Oslo Faculty of Medicine, Department of Community Medicine and Global health<br>Aung , Wai Phyo; University of Oslo Faculty of Medicine, Department of Community Medicine and Global health; Ministry of Health and Sports, Department of Public Health, Occupational and Environmental Health Division<br>Bjertness, Espen; University of Oslo Faculty of Medicine, Department of Community Medicine and Global health |
| <b>Primary Subject Heading</b>: | Public health                                                                                                                                                                                                                                                                                                                                                                                                                                                                                                                                                   |
| Secondary Subject Heading:      | Epidemiology, Global health                                                                                                                                                                                                                                                                                                                                                                                                                                                                                                                                     |
| Keywords:                       | PUBLIC HEALTH, EPIDEMIOLOGY, PREVENTIVE MEDICINE                                                                                                                                                                                                                                                                                                                                                                                                                                                                                                                |
|                                 |                                                                                                                                                                                                                                                                                                                                                                                                                                                                                                                                                                 |

SCHOLARONE™  
Manuscripts

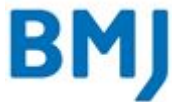

I, the Submitting Author has the right to grant and does grant on behalf of all authors of the Work (as defined in the below author licence), an exclusive licence and/or a non-exclusive licence for contributions from authors who are: i) UK Crown employees; ii) where BMJ has agreed a CC-BY licence shall apply, and/or iii) in accordance with the terms applicable for US Federal Government officers or employees acting as part of their official duties; on a worldwide, perpetual, irrevocable, royalty-free basis to BMJ Publishing Group Ltd ("BMJ") its licensees and where the relevant Journal is co-owned by BMJ to the co-owners of the Journal, to publish the Work in this journal and any other BMJ products and to exploit all rights, as set out in our [licence](#).

The Submitting Author accepts and understands that any supply made under these terms is made by BMJ to the Submitting Author unless you are acting as an employee on behalf of your employer or a postgraduate student of an affiliated institution which is paying any applicable article publishing charge ("APC") for Open Access articles. Where the Submitting Author wishes to make the Work available on an Open Access basis (and intends to pay the relevant APC), the terms of reuse of such Open Access shall be governed by a Creative Commons licence – details of these licences and which [Creative Commons](#) licence will apply to this Work are set out in our licence referred to above.

Other than as permitted in any relevant BMJ Author's Self Archiving Policies, I confirm this Work has not been accepted for publication elsewhere, is not being considered for publication elsewhere and does not duplicate material already published. I confirm all authors consent to publication of this Work and authorise the granting of this licence.

1  
2  
3 **Urban-rural differences in overweight and obesity among 25-64 years old Myanmar**  
4 **residents: a cross-sectional, nationwide survey**

5  
6  
7 **Rupa Thapa<sup>1</sup>, Cecilie Dahl<sup>1</sup>, Wai Phyo Aung<sup>1,2</sup>, Espen Bjertness<sup>1</sup>**

8  
9 **Author Affiliations**

10  
11  
12 1. Department of Community Medicine and Global Health, Institute of Health and Society,  
13 Faculty of Medicine, University of Oslo, Oslo 0318, Norway; espen.bjertness@medisin.uio.no  
14 (EB); cecilie.dahl@medisin.uio.no (CD); rupathapa.rupa@gmail.com (RT)

15  
16  
17 2. Occupational and Environmental Health Division, Department of Public Health, Ministry of  
18 Health and Sports, Nay Pyi Taw 15011, Myanmar; w.p.aung@medisin.uio.no (WPA)

19  
20  
21 Correspondence to rupathapa.rupa@gmail.com

22  
23  
24 Word count: 4,525

25  
26 **Abstract**

27  
28  
29 **Objectives:** To investigate whether urban-rural location and socioeconomic factors (income,  
30 education, and employment) are associated with body mass index (BMI) and waist-hip ratio  
31 (W/H-ratio), and to further explore whether the associations between urban-rural location and  
32 BMI or W/H-ratio could be mediated through variations in socioeconomic factors.

33  
34  
35 **Design:** Cross-sectional, WHO STEPS survey of non-communicable disease (NCD) risk  
36 factors

37  
38  
39 **Setting:** Urban and rural areas of Myanmar

40  
41  
42 **Participants:** A total of 8,390 men and women aged 25 to 64 years included during the study  
43 period from September to December 2014. Institutionalized people (Buddhist monks and  
44 nuns, hospitalized patients) and temporary residents were excluded.

45  
46  
47 **Results:** The prevalence of overweight and obesity was higher in the urban areas and  
48 increased with increasing SES score. Mean BMI was higher among urban residents ( $\beta= 2.49$   
49  $\text{kg/m}^2$ ; 95% CI 2.28, 2.70;  $p<0.001$ ), individuals living above poverty line, i.e.  $\geq 1.9$  USD/day  
50 ( $\beta= 0.74$   $\text{kg/m}^2$ ; 95% CI 0.43, 1.05;  $p<0.001$ ), and those with high education attainment ( $\beta=$   
51  $1.48$   $\text{kg/m}^2$ ; 95% CI 1.13, 1.82;  $p<0.001$ ) when adjusting for potential confounders. Similarly,  
52 greater W/H-ratio was observed in participants living in an urban area, among those with  
53 earnings above poverty line, and among unemployed individuals. The association between  
54  
55  
56  
57  
58  
59  
60

1  
2  
3 urban-rural location and BMI was found to be partially mediated by a composite SES score  
4 (9%), income (17%), education (16%), and employment (16%), while the association between  
5 urban-rural location and W/H-ratio was found to be partially mediated by income (12%),  
6 education (6%), and employment (6%).  
7  
8  
9

10 **Conclusion:** Residents living in urban locations had higher BMI and greater W/H-ratio,  
11 partially explained by differences in socioeconomic indicators, indicating that socioeconomic  
12 factors should be emphasized in the management of overweight and obesity in the Myanmar  
13 population. Furthermore, new national or sub-national STEPS surveys should be conducted in  
14 Myanmar to observe the disparity in trends of the urban-rural differential.  
15  
16  
17  
18

### 19 **Strengths and limitation of this study**

- 20 • The study is novel in reporting associations between income, education, employment with  
21 BMI or W/H-ratio in Myanmar.
  - 22 • The study analyses a large nationally representative sample including both urban and rural  
23 populations.
  - 24 • The internationally recommended WHO STEPS protocol was followed.
  - 25 • The findings may be generalized to Myanmar's non-institutionalized population only.
  - 26 • Due to cross-sectional nature of the study, causality cannot be inferred.
- 27  
28  
29  
30  
31  
32  
33  
34

### 35 **INTRODUCTION**

36  
37  
38 Overweight and obesity pose a major economic burden to society, and are important  
39 determinants for non-communicable diseases (NCDs), including cardiovascular diseases  
40 (CVDs), diabetes, musculoskeletal disorders, and certain types of cancers.<sup>1</sup> An even greater  
41 risk seems to be associated with excess abdominal obesity.<sup>2,3</sup> According to the World Health  
42 Organization (WHO), 39% of adults worldwide were overweight and 13% were obese in  
43 2016.<sup>1</sup> In the South-east Asia region (SEAR), the estimated proportions of overweight and  
44 obese were 21.5% and 4.6%, respectively.<sup>4,5</sup>  
45  
46  
47  
48  
49

50  
51 Urbanization, a complex socioeconomic process that gradually transforms the society from  
52 rural into urban settlements, including migrations of people from rural to urban areas, is  
53 frequently cited as the most important factor contributing to increasing overweight and  
54 obesity, explained by increased access to unhealthy foods and a less physically active lifestyle  
55 in urban areas.<sup>6-9</sup> Moreover, among urban residents the socioeconomic status (SES) is likely  
56 to be higher, which in turn is associated with higher body mass index (BMI) in most low- and  
57  
58  
59  
60

1  
2  
3 middle-income countries (LMICs).<sup>10,11</sup> However, a recent publication by the NCD risk Factor  
4 Collaboration comprising evidence from 2,009 population-based studies on trends in mean  
5 BMI (from 1985 to 2017), showed that increasing BMI in rural areas has been the main  
6 contributor to the global rise in mean BMI over the last 33 years, while the contribution from  
7 rural to urban migration was small.<sup>12</sup>  
8  
9  
10

11  
12 In Myanmar, two surveys were carried out in 2004 and 2014 in the most populated and  
13 developed part of Myanmar, the Yangon region.<sup>13,14</sup> Findings from these studies indicate  
14 increasing trends in overweight and obesity. The overall prevalence of combined overweight  
15 and obesity in urban areas of Yangon increased from 39.8% in 2004 to 40.9% in 2014,  
16 whereas in rural areas, there was an increase in overweight and obesity prevalence from  
17 23.0% to 31.2%.<sup>14-16</sup> In 2009, a nationwide survey in Myanmar found an overall prevalence of  
18 overweight and obesity of 18.7% and 6.8% respectively.<sup>17</sup> The most recent nationwide study  
19 (2015-2016), the Myanmar Demographic and Health Survey,<sup>18</sup> included 12,160 women in  
20 reproductive age, and reported a high prevalence of overweight (28.1%) and obesity (13.1%),  
21 and a significantly higher proportion of overweight and obesity with urban residency, higher  
22 economic status, and having secondary education.  
23  
24  
25  
26  
27  
28  
29  
30  
31

32 Myanmar has been lagging behind neighbouring countries in terms of sociodemographic  
33 development, which could partly be due to socio-political difficulties during more than 50  
34 years of military rule, which was gradually replaced with a democratic development in  
35 2011.<sup>19</sup> In order to contribute to a better understanding of socioeconomic determinants of  
36 overweight and obesity in Myanmar, we analysed a nationally representative sample of 25-64  
37 year old men and women from 2014,<sup>20</sup> with the following objectives: 1) to investigate  
38 associations of urban-rural location with BMI and waist-hip ratio (W/H-ratio); 2) to explore  
39 the association of selected socioeconomic characteristics (income, education, and employment  
40 status) with BMI and W/H-ratio; and 3) to assess whether the potential associations between  
41 urban-rural location and BMI or W/H-ratio could be explained by (i.e. mediated through)  
42 variations in socioeconomic characteristics (income, education, and employment status).  
43  
44  
45  
46  
47  
48  
49  
50

## 51 **METHODS**

### 52 **Study design, sampling, and participants**

53  
54  
55 A national cross-sectional survey of NCD risk factors in Myanmar (WHO STEPS survey) was  
56 conducted between September and December 2014 in 52 different townships in Myanmar.<sup>20</sup>  
57  
58  
59  
60

1  
2  
3 A detailed methodological description of the sampling and data collection has been published  
4 previously,<sup>20</sup> and is summarized below.  
5  
6

7 The STEPS survey used a multistage cluster sampling method for the selection of townships,  
8 wards and villages, households, and eligible participants at each of the selected households.  
9 The first stage of the sampling method consisted of townships, which formed the Primary  
10 Sampling Units (PSUs). Overall, 52 PSUs were selected out of the total of 330 townships,  
11 using probability proportionate to size of population in each PSU (PPS). In the second stage,  
12 six Secondary Sampling Units (SSUs) i.e., wards (from urban townships) and villages (from  
13 rural townships) were selected from each chosen PSU giving a total of 312 SSUs for the  
14 whole country. The list of households with unique identification number developed from a  
15 recent listing of households was used as the sampling frame for the third stage. From each  
16 selected SSU, 30 households were chosen using a systematic random sampling method. In  
17 this sampling method, the elements to be included in the sample are selected based on a  
18 systematic rule, using a fixed sampling interval obtained by dividing population size by  
19 required sample size.<sup>21</sup> In the 4<sup>th</sup> stage, recruitment of one eligible participant aged between  
20 25 and 64 years was done from the selected household. The Kish sampling method was used  
21 to rank the eligible participants in each household in order of decreasing age, starting with  
22 males then females, and randomly selected using the automated program for Kish selection in  
23 the handheld PDA (Personal Digital Assistant).<sup>20</sup>  
24  
25  
26  
27  
28  
29  
30  
31  
32  
33  
34  
35  
36

37 The study population comprises 25 to 64 years old men and women residing in both urban  
38 and rural areas. The following exclusion criteria were used: individuals with a mental or  
39 physical illness deemed too ill to participate, institutionalized people (Buddhist monks and  
40 nuns, armed forces, hospitalized patients, prisoners), and temporary residents (living in a  
41 locality for less than 6 months).  
42  
43  
44  
45

46 Altogether, a total of 8,757 men and women aged 25-64 years, residing in both urban and  
47 rural areas, participated in the survey. The response rates were 94% for the questionnaire,  
48 91% for physical measurements, and 90% for biochemical measurements. The final sample  
49 for the current study included 8,390 adults who participated in both STEP 1 and STEP 2,  
50 excluding 87 women who were currently pregnant, and 280 individuals with missing BMI.  
51  
52  
53  
54  
55

### 56 **Data collection and measurements**

57  
58 The STEPS Instrument covers the following three different levels of "STEPS" of risk factor  
59 assessment. STEP (1) questionnaire survey; STEP (2) physical measurement; STEP (3)  
60

1  
2  
3 biochemical measurements. In the present study, we included variables from STEP 1 and  
4 STEP 2.  
5

6  
7 Eighteen trained teams (containing six members in each) collected the data. The English  
8 WHO STEPS Instrument (core and expanded) questionnaire version 3.0 was translated into  
9 the Myanmar version for the survey. A five-day training was conducted at University of  
10 Medicine (2), Yangon. The data collection teams conducted a pilot survey of all steps of data  
11 collection in the wards of North Okkalapa Township, Yangon on the fifth day of the training.  
12 Data for STEP 1 and 2 were collected at the survey participant's household during the first  
13 visit. Face to face interviews were conducted to collect information on sociodemographic  
14 factors and behavioural risk factors.  
15

16  
17 A Seca 217 portable stadiometer was used to measure body height without footwear and any  
18 hat or hair ties. Findings were recorded in centimetre (cm) to the nearest 0.1 cm. Body weight  
19 was measured with a pre-calibrated portable Seca Digital Floor Scale with High Capacity  
20 (Model 813) to the nearest 0.1 kilogram (kg). During weighing, the participants were  
21 requested to wear light clothing without footwear.<sup>20</sup> Waist and hip circumference  
22 measurement were done in a private area using a Seca 201 measuring tape. The waist  
23 circumference was measured in centimetres over light clothing at the midpoint between the  
24 last palpable rib and the top of the iliac crest. The hip circumference measurement was taken  
25 by placing the tape horizontally at maximum circumference over the buttocks. Measures were  
26 taken to the nearest 0.1 cm.<sup>20</sup>  
27  
28  
29  
30  
31  
32  
33  
34  
35  
36  
37  
38

### 39 **Variables**

#### 40 **BMI and W/H-ratio**

41  
42 BMI is the most widely used measure of general overweight and obesity<sup>22,23</sup> whereas W/H-  
43 ratio measures abdominal or central obesity and is a better predictor of CVD risk.<sup>24,25</sup>  
44 Therefore, we have included both measures in our study.  
45  
46  
47  
48  
49

50  
51 BMI was calculated as weight in kilograms divided by the height in meters squared. Cut-off  
52 points for BMI were defined based on WHO recommendations: BMI of 25.0-29.9 kg/m<sup>2</sup> was  
53 considered overweight whereas having a BMI of 30 kg/m<sup>2</sup> or higher was considered obese.<sup>26</sup>  
54 For comparison, BMI was also classified according to Asian specific cut-off points: BMI of  
55 23.0-27.4 kg/m<sup>2</sup> (overweight) and BMI of  $\geq 27.5$  kg/m<sup>2</sup> (obesity).<sup>27</sup> W/H-ratio was defined as  
56  
57  
58  
59  
60



1  
2  
3 the ratio of the circumference of the waist to that of the hip. Central obesity was defined as a  
4 W/H-ratio above 0.90 for men and above 0.85 for women.<sup>28</sup>

#### 6 7 Urban-rural location

8  
9 According to the ward or village tract administration law 2012, a ward is defined as an urban  
10 unit and a village is defined as a rural unit.<sup>29</sup> Hence, the same definition was used to define  
11 urban and rural areas in the current study.  
12  
13

#### 14 15 Sociodemographic factors

16  
17 Age was defined as completed years of age. Education level was defined by both total number  
18 of years spent in school and by highest educational level obtained. It was categorized into  
19 seven categories: no formal schooling, less than primary school, primary school completed,  
20 secondary school completed, high school completed, college/university completed, and post  
21 graduate degree. In multivariable analyses, education level was collapsed into three groups:  
22 low level, medium level, and high level education. Low level was defined as education below  
23 primary school completion; Medium level: completion of primary and secondary school; High  
24 level: completion of high school, university, or post-graduate education.  
25  
26  
27  
28  
29  
30  
31

32 Occupation was defined according to the main work status over the past 12 months and  
33 categorized as government employee, non-government employee, self-employed, nonpaid,  
34 student, homemaker, retired, unemployed (able to work), and unemployed (unable to work).  
35 In multivariable analyses, employment status was collapsed into two groups: employed and  
36 unemployed. Employed group included people who were government, non-government  
37 employee, self-employed, and homemakers. Nonpaid, student, retired, unemployed (both able  
38 and unable to work) were categorized in the unemployed group.  
39  
40  
41  
42  
43  
44

45 Daily personal income was calculated from the entire household income divided by the total  
46 number of household members excluding the household members under 18 years of age.  
47 Income was converted from Myanmar Kyats into United States Dollars (USD). Exchange rate  
48 of 1 USD was 970 Myanmar Kyats as of 1<sup>st</sup> September 2014.<sup>30</sup> Cut-off values for poverty line  
49 was used as defined by World Bank: 1.90 USD/day.<sup>31</sup>  
50  
51  
52  
53

#### 54 55 **Statistical methods**

56 Statistical analysis was performed in the Statistical Package for Social Sciences (SPSS)  
57 version 26.0 (Armonk, NY: IBM Corp). The characteristics of the study participants were  
58 presented in the form of frequency (N) and percentages (%) for categorical variables, and  
59  
60

1  
2  
3 mean with standard deviation (SD) for continuous variables. Differences in categorical  
4 variables were tested using the chi-square test or Fischer's exact test, whereas differences in  
5 the mean for continuous variables were tested using two tailed t-tests. Linear regression was  
6 used to estimate the association between the urban-rural location and socioeconomic factors  
7 variables (income, education, and employment status) with continuous outcomes (BMI and  
8 W/H-ratio), obtaining betas ( $\beta$ ) with 95% confidence intervals (CIs). Potential multi-  
9 collinearity between variables was assessed with variance inflation factors (VIF). A VIF value  
10 greater than 10 was considered an indication of multi-collinearity; however, no significant  
11 multi-collinearity was observed. We tested for heteroscedasticity by using robust estimator  
12 and there were only minor changes in the estimates, which indicates there was no problem of  
13 heteroscedasticity. For all statistical analysis, the two-tailed significance level was set to 0.05.

14  
15  
16  
17  
18  
19  
20  
21  
22  
23 Based on previous literature and construction of Directed Acyclic Graphs (DAGs),<sup>32</sup> we  
24 identified potential confounders and mediators (See Supplementary Figure 1). For objective 1,  
25 for associations of urban-rural location with BMI and W/H-ratio, age and gender were  
26 identified as confounders (See Supplementary Figure 1:A), and they were therefore included  
27 in multivariable models to obtain the total effect of urban-rural location on BMI and W/H-  
28 ratio.

29  
30  
31  
32  
33  
34 For the second objective, for the association of socioeconomic characteristics (income,  
35 education, and employment status) with BMI and W/H-ratio, we constructed three different  
36 DAGs (See Supplementary Figure 1: B, C, and D) for confounder adjustments.

37  
38  
39  
40  
41  
42  
43  
44  
45  
46  
47  
48  
49  
50  
51  
52  
53  
54  
55  
56  
57  
58  
59  
60  
To study the statistical effect of the SES variables (income, education, and employment status) together, the variables were assigned SES values (0/1) and a composite SES score was calculated. For this, education level was collapsed into two groups: high education (defined as high school completion and above) and low education (defined as education below high school completion). Participants with earnings above poverty line, high education attainment (binary) and employment were assigned SES value=1 and the lower category was assigned SES value=0. Total SES score for each participant was obtained by summing up values and total SES score was further categorized into three SES groups: low (total SES score=0), medium (total SES score=1 and 2), and high (total SES score=3) (See Supplementary Table 1). We assessed the association between SES groups and BMI or W/H-ratio with adjustment for confounders (age, gender, and urban-rural location).

1  
2  
3 The third objective explored whether the potential association between urban-rural location  
4 and BMI or W/H-ratio was mediated through socioeconomic characteristics. We included the  
5 potential mediators income, education, employment, and the composite SES score variable  
6 one by one in order to obtain the direct effect of urban-rural location on BMI and W/H-ratio,  
7 and the proportion mediated through each of the socioeconomic factors.  
8  
9  
10  
11

## 12 **Ethics**

13  
14 Informed consent was obtained from the study participants; all information was handled with  
15 strict confidentiality. The participants were informed about the purpose and procedures of the  
16 study. Ethical approvals were obtained from the Norwegian Regional Committees for Medical  
17 and Health Research Ethics (REK) (Reference no. REK 2016/379) and the Ethical Review  
18 Committee of Department of Medical Research (Myanmar).  
19  
20  
21  
22

## 23 **Patient and Public Involvement**

24  
25 No patients or public were involved in setting the research question or the outcome measures,  
26 nor were they involved in the design and implementation of the study.  
27  
28  
29

## 30 **RESULTS**

31  
32 The mean age of the study participants was 44.9 years, with rural participants being slightly  
33 younger than urban participants (Table 1). Nearly three quarters of the participants (68.6%),  
34 were from rural areas (not shown in tables). The mean length of education was 7.7 years in  
35 urban areas and 4.8 years in rural areas. In urban areas, the majority had primary education  
36 only (31.9%), 6.6% had no formal schooling, and 42.7% were self-employed (Table 1). In the  
37 rural areas, 39.6% had primary education only, 18.8% had no formal schooling, and 68.6%  
38 were self-employed. The proportion living on <1.9 USD/day was 4.9% in urban areas and  
39 17.5% in rural areas. The prevalence of overweight (WHO standard cut-off: BMI 25-29.9)  
40 and obesity (WHO standard cut-off: BMI  $\geq 30$ ) was 20.4% and 6.5% respectively (not shown  
41 in tables). The prevalence of overweight (Asian cut-off: BMI 23-27.4 kg/m<sup>2</sup>) was higher in  
42 women in urban areas (35.4%) in comparison to women in rural areas (28.4%) (Figure 1).  
43 Similarly, the prevalence of obesity (Asian cut-off: BMI  $\geq 27.5$  kg/m<sup>2</sup>) was higher in urban  
44 women (27.9%), compared to rural women (12.7%) (Figure 1).  
45  
46  
47  
48  
49  
50  
51  
52  
53  
54  
55  
56  
57  
58  
59  
60

Table 1: Characteristics of 25-64 years old residents in Myanmar, by gender and urban-rural location

| Variables                            | Total<br>(n=8390)<br>N (%) | Urban                    |                             |                            | Rural                     |                             |                            |
|--------------------------------------|----------------------------|--------------------------|-----------------------------|----------------------------|---------------------------|-----------------------------|----------------------------|
|                                      |                            | Male<br>(n=830)<br>N (%) | Female<br>(n=1798)<br>N (%) | Total<br>(n=2628)<br>N (%) | Male<br>(n=2117)<br>N (%) | Female<br>(n=3645)<br>N (%) | Total<br>(n=5762)<br>N (%) |
| <b>Age (Mean years ± SD)</b>         | 44.9 ± 10.7                | 47.0 ± 10.8              | 46.0 ± 10.3                 | 46.4 ± 10.4                | 44.1 ± 10.9               | 44.4 ± 10.7                 | 44.2 ± 10.8                |
| <b>Age group (years)</b>             |                            |                          |                             |                            |                           |                             |                            |
| 25-34                                | 1689 (20.1)                | 139 (16.7)               | 272 (15.1)                  | 411 (15.6)                 | 488 (23.1)                | 790 (21.7)                  | 1278 (22.2)                |
| 35-44                                | 2315 (27.6)                | 178 (21.4)               | 511 (28.4)                  | 689 (26.2)                 | 577 (27.3)                | 1049 (28.8)                 | 1626 (28.2)                |
| 45-54                                | 2412 (28.7)                | 269 (32.4)               | 558 (31.0)                  | 827 (31.5)                 | 580 (27.4)                | 1005 (27.6)                 | 1585 (27.5)                |
| 55-64                                | 1974 (23.5)                | 244 (29.4)               | 457 (25.4)                  | 701 (26.7)                 | 472 (22.3)                | 801 (22.0)                  | 1273 (22.1)                |
| <b>Education (Mean Years ± SD)</b>   | 5.7 ± 4.1                  | 8.4 ± 3.9                | 7.5 ± 4.2                   | 7.7 ± 4.1                  | 5.3 ± 3.4                 | 4.5 ± 3.8                   | 4.8 ± 3.7                  |
| <b>Education level</b>               |                            |                          |                             |                            |                           |                             |                            |
| No formal School                     | 1256 (15.0)                | 51 (6.1)                 | 122 (6.8)                   | 173 (6.6)                  | 370 (17.5)                | 713 (19.6)                  | 1083 (18.8)                |
| Less than Primary School             | 1912 (22.8)                | 66 (8.0)                 | 293 (16.3)                  | 359 (13.7)                 | 434 (20.5)                | 1119 (30.7)                 | 1553 (27.0)                |
| Primary School completed             | 3121 (37.2)                | 265 (31.9)               | 574 (31.9)                  | 839 (31.9)                 | 933 (44.1)                | 1349 (37.0)                 | 2282 (39.6)                |
| Secondary School completed           | 1044 (12.4)                | 214 (25.8)               | 349 (19.4)                  | 563 (21.4)                 | 239 (11.3)                | 242 (6.6)                   | 481 (8.3)                  |
| High School completed                | 524 (6.2)                  | 117 (14.1)               | 203 (11.3)                  | 320 (12.2)                 | 86 (4.1)                  | 118 (3.2)                   | 204 (3.5)                  |
| College/university completed         | 499 (5.9)                  | 110 (13.3)               | 241 (13.4)                  | 351 (13.4)                 | 53 (2.5)                  | 95 (2.6)                    | 148 (2.6)                  |
| Post graduate degree                 | 34 (0.4)                   | 7 (0.8)                  | 16 (0.9)                    | 23 (0.9)                   | 2 (0.1)                   | 9 (0.2)                     | 11 (0.2)                   |
| <b>Employment Status</b>             |                            |                          |                             |                            |                           |                             |                            |
| Government Employee                  | 359 (4.3)                  | 81 (9.8)                 | 120 (6.7)                   | 201 (7.6)                  | 59 (2.8)                  | 99 (2.7)                    | 158 (2.7)                  |
| Non-Government Employee              | 560 (6.7)                  | 88 (10.6)                | 78 (4.3)                    | 166 (6.3)                  | 182 (8.6)                 | 212 (5.8)                   | 394 (6.8)                  |
| Self-employed                        | 5074 (60.5)                | 495 (59.6)               | 628 (34.9)                  | 1123 (42.7)                | 1667 (78.7)               | 2284 (62.7)                 | 3951 (68.6)                |
| Nonpaid                              | 210 (2.5)                  | 36 (4.3)                 | 28 (1.6)                    | 64 (2.4)                   | 59 (2.8)                  | 87 (2.4)                    | 146 (2.5)                  |
| Student                              | 8 (0.1)                    | 3 (0.4)                  | 0 (0.0)                     | 3 (0.1)                    | 2 (0.1)                   | 3 (0.1)                     | 5 (0.1)                    |
| Homemaker                            | 1559 (18.6)                | 6 (0.7)                  | 811 (45.1)                  | 817 (31.1)                 | 7 (0.3)                   | 735 (20.2)                  | 742 (12.9)                 |
| Retired                              | 174 (2.1)                  | 61 (7.3)                 | 38 (2.1)                    | 99 (3.8)                   | 44 (2.1)                  | 31 (0.9)                    | 75 (1.3)                   |
| Unemployed (able to work)            | 298 (3.6)                  | 47 (5.7)                 | 70 (3.9)                    | 117 (4.5)                  | 59 (2.8)                  | 122 (3.3)                   | 181 (3.1)                  |
| Unemployed (unable to work)          | 144 (1.7)                  | 13 (1.6)                 | 24 (1.3)                    | 37 (1.4)                   | 38 (1.8)                  | 69 (1.9)                    | 107 (1.9)                  |
| Refused to answer                    | 4 (0.0)                    | 0 (0.0)                  | 1 (0.1)                     | 1 (0.0)                    | 0 (0.0)                   | 3 (0.1)                     | 3 (0.1)                    |
| <b>Daily Income USD/day (n=7408)</b> |                            |                          |                             |                            |                           |                             |                            |
| < 1.9                                | 992 (13.4)                 | 38 (5.0)                 | 79 (4.8)                    | 117 (4.9)                  | 316 (17.0)                | 559 (17.8)                  | 875 (17.5)                 |
| ≥ 1.9                                | 6416 (86.6)                | 727 (95.0)               | 1559 (95.2)                 | 2286 (95.1)                | 1540 (83.0)               | 2590 (82.2)                 | 4130 (82.5)                |

SD, Standard deviation; USD, United States Dollar

### Objective 1: Association between urban-rural location and BMI or W/H-ratio

The mean BMI was higher among urban than rural residents by 2.49 kg/m<sup>2</sup> ( $\beta=2.49$  kg/m<sup>2</sup>; 95% CI 2.28, 2.70;  $p<0.001$ ) when adjusting for age and gender (Table 2). Similarly, W/H-ratio was 0.015 greater in participants living in an urban area ( $\beta=0.015$ ; 95% CI 0.011, 0.020;  $p<0.001$ ) compared to rural, when adjusting for age and gender (Table 3).

Table 2: Level of associations between urban-rural location and socioeconomic factors with BMI (kg/m<sup>2</sup>) among 25-64 years old Myanmar residents

| Variables               | Category      | Mean<br>BMI ± SD | Crude estimates    | Adjusted estimates               |
|-------------------------|---------------|------------------|--------------------|----------------------------------|
|                         |               |                  | β (95% CI)         | β (95% CI)                       |
| Location                | Rural         | 21.9 ± 4.1       | Ref.               | Ref.                             |
|                         | Urban         | 24.5 ± 5.5       | 2.62** (2.40-2.83) | 2.49 <sup>a</sup> ** (2.28-2.70) |
| Income <sup>1</sup>     | < 1.9 USD/day | 21.5 ± 4.1       | Ref.               | Ref.                             |
|                         | ≥ 1.9 USD/day | 22.9 ± 4.8       | 1.44** (1.12-1.76) | 0.74 <sup>b</sup> ** (0.43-1.05) |
| Education               | Low           | 21.9 ± 4.2       | Ref.               | Ref.                             |
|                         | Medium        | 22.9 ± 4.8       | 0.98** (0.76-1.21) | 0.88 <sup>c</sup> ** (0.66-1.10) |
|                         | High          | 24.2 ± 5.7       | 2.28** (1.95-2.61) | 1.48 <sup>c</sup> ** (1.13-1.82) |
| Employment <sup>2</sup> | Employed      | 22.7 ± 4.7       | Ref.               | Ref.                             |
|                         | Unemployed    | 22.7 ± 5.1       | 0.04 (-0.30-0.38)  | -0.06 <sup>d</sup> (-0.39-0.26)  |
| SES                     | Low           | 21.4 ± 4.0       | Ref.               | Ref.                             |
|                         | Medium        | 22.9 ± 4.8       | 1.42** (1.09-1.76) | 0.81 <sup>c</sup> ** (0.49-1.14) |
|                         | High          | 24.1 ± 4.8       | 2.65** (1.54-3.77) | 1.28 <sup>c</sup> * (0.21-2.36)  |

\*\*p<0.001, \*p<0.05, <sup>1</sup>982 participants with missing value for income excluded in crude and adjusted estimates; <sup>2</sup>4 participants with missing employment status excluded in crude and adjusted estimates; BMI, Body mass index; CI, Confidence interval; Ref., reference category; SD, Standard Deviation; SES, Socioeconomic Status; USD, United States Dollar

a) adjusted for age and gender

b) adjusted for age, gender, urban-rural location, education, and employment

c) adjusted for age, gender, and urban-rural location

d) adjusted for age, gender, urban-rural location, and education

Table 3: Level of associations between urban-rural location and socioeconomic factors with W/H-ratio among 25-64 years old Myanmar residents

| Variables               | Category      | Mean<br>W/H-ratio<br>± SD | Crude estimates        | Adjusted estimates                |
|-------------------------|---------------|---------------------------|------------------------|-----------------------------------|
|                         |               |                           | β (95% CI)             | β (95% CI)                        |
| Location                | Rural         | 0.84 ± 0.09               | Ref.                   | Ref.                              |
|                         | Urban         | 0.86 ± 0.11               | 0.016*** (0.012-0.021) | 0.015a*** (0.011-0.020)           |
| Income <sup>1</sup>     | < 1.9 USD/day | 0.84 ± 0.07               | Ref.                   | Ref.                              |
|                         | ≥ 1.9 USD/day | 0.85 ± 0.09               | 0.010* (0.004-0.016)   | 0.007* <sup>b</sup> (0.001-0.013) |
| Education               | Low           | 0.84 ± 0.08               | Ref.                   | Ref.                              |
|                         | Medium        | 0.85 ± 0.10               | 0.005* (0.00-0.009)    | 0.002 <sup>c</sup> (-0.003-0.006) |
|                         | High          | 0.85 ± 0.11               | 0.006 (-0.001-0.013)   | 0.002 <sup>c</sup> (-0.006-0.009) |
| Employment <sup>2</sup> | Employed      | 0.85 ± 0.09               | Ref.                   | Ref.                              |
|                         | Unemployed    | 0.86 ± 0.10               | 0.018*** (0.011-0.025) | 0.006 <sup>d</sup> (-0.001-0.014) |
| SES                     | Low           | 0.84 ± 0.07               | Ref.                   | Ref.                              |
|                         | Medium        | 0.85 ± 0.09               | 0.012** (0.005-0.018)  | 0.008 <sup>c*</sup> (0.001-0.014) |
|                         | High          | 0.88 ± 0.19               | 0.044*** (0.022-0.066) | 0.019 <sup>c</sup> (-0.002-0.040) |

\*\*\*p<0.001, \*\*p<0.01, \*p<0.05; 7 participants with missing W/H-ratio excluded in crude and adjusted estimates; <sup>1</sup>982 participants with missing value for income excluded in crude and adjusted estimates; <sup>2</sup>4 participants with missing employment status excluded in all models; CI, Confidence interval; Ref., Reference category; SD, Standard Deviation; SES, Socioeconomic Status; USD, United States Dollar; W/H-ratio, Waist-hip ratio

a) adjusted for age and gender

b) adjusted for age, gender, urban-rural location, education, and employment

c) adjusted for age, gender, and urban-rural location

d) adjusted for age, gender, urban-rural location, and education

## Objective 2: Association between socioeconomic factors (income, education, and employment status) and BMI or W/H-ratio

The socioeconomic factors income and education but not employment, were associated with BMI (Table 2). Mean BMI was 0.74 kg/m<sup>2</sup> higher among individuals living above compared to those living below poverty line (β=0.74 kg/m<sup>2</sup>; 95% CI 0.43, 1.05; p<0.001), when adjusting for age, gender, urban-rural location, education, and employment. BMI was 0.88 kg/m<sup>2</sup> higher among individuals with medium education and 1.48 kg/m<sup>2</sup> higher among individuals with high education (Medium education vs. low: β=0.88 kg/m<sup>2</sup>; 95% CI 0.66, 1.10; p<0.001 and High education vs. low: β=1.48 kg/m<sup>2</sup>; 95% CI 1.13, 1.82; p<0.001). Moreover, BMI was higher in medium and high SES groups (Medium SES vs. low: β=0.81 kg/m<sup>2</sup>; 95% CI 0.49, 1.14; p<0.001 and High SES vs. low: β=1.28 kg/m<sup>2</sup>; 95% CI 0.21, 2.36; p<0.05) (Table 2).

1  
2  
3 There was an association between the socioeconomic indicators income and employment but  
4 not education, with W/H-ratio (Table 3). Among those with earnings  $\geq 1.9$  USD/day, the  
5 W/H-ratio was 0.007 greater ( $\beta=0.007$ ; 95% CI 0.001, 0.013;  $p<0.05$ ) than those earning  $<1.9$   
6 USD/day. Unemployed participants had greater W/H-ratio than employed participants in the  
7 crude estimates, but the association was attenuated in the adjusted estimates (Table 3). In  
8 addition, medium and high SES groups had greater W/H-ratios than the low SES group in the  
9 crude estimates (Table 3).

10  
11  
12  
13  
14  
15  
16 When combining income, education, and employment status into a composite SES score, the  
17 prevalence of overweight (BMI 25-29.9) and obesity (BMI  $\geq 30$ ) increased with increasing  
18 SES score for both genders (Figure 2). Similarly, the prevalence of central obesity (W/H-ratio  
19  $>0.9$  for men and W/H-ratio  $>0.85$  for women) increased with increasing SES score in men,  
20 whereas in women the prevalence was almost similar in medium and high SES group (Figure  
21 2).

### 22 23 24 25 26 27 **Objective 3: Association between urban-rural location and BMI or W/H-ratio mediated** 28 **by socioeconomic factors (income, education, and employment status)**

29  
30  
31 Table 4 shows the adjusted total- and direct effects of urban-rural location on BMI and W/H-  
32 ratio. There was change in the estimates for BMI after adjusting for income (Table 4), which  
33 gave an indirect effect of urban-rural location through income:  $2.50-2.08=0.42$  kg/m<sup>2</sup>, and a  
34 mediated proportion of 17% ( $0.42/2.50=0.17$ ). Similarly, adjusting for education gave an  
35 indirect effect of urban-rural location through education of 0.40 kg/m<sup>2</sup>, and a mediated  
36 proportion of 16%. When adjusting for employment, corresponding figures were 0.40 kg/m<sup>2</sup>  
37 and mediated proportion of 16%. Adjustment for the composite SES score gave an indirect  
38 effect of urban-rural location through composite SES score of 0.22 kg/m<sup>2</sup>, and a mediated  
39 proportion of 9%. There was change in the estimates for W/H-ratio after adjusting for income,  
40 which gave an indirect effect of urban-rural location through income of 0.002, and a mediated  
41 proportion of 12%. Similarly, adjusting for education gave an indirect effect of urban-rural  
42 location through education of 0.001, and a mediated proportion of 6%, and when adjusting for  
43 employment: 0.001 (mediated proportion of 6%) (Table 4). Furthermore, adjusting for  
44 composite SES score gave an indirect effect of urban-rural location through composite SES  
45 score of 0.002, and a mediated proportion of 12%.

Table 4: Total- versus direct effect of urban-rural location on BMI and W/H-ratio (objective 3), among 25-64 years old Myanmar residents

| Location | BMI                  |                                               |                                  |                                     |                                      | W/H-ratio <sup>1</sup>  |                                               |                                  |                                     |                                      |
|----------|----------------------|-----------------------------------------------|----------------------------------|-------------------------------------|--------------------------------------|-------------------------|-----------------------------------------------|----------------------------------|-------------------------------------|--------------------------------------|
|          | Total effect (a)     | Direct effect through composite SES score (b) | Direct effect through income (c) | Direct effect through education (d) | Direct effect through employment (e) | Total effect (a)        | Direct effect through composite SES score (b) | Direct effect through income (c) | Direct effect through education (d) | Direct effect through employment (e) |
|          | $\beta$ (95% CI)     | $\beta$ (95% CI)                              | $\beta$ (95% CI)                 | $\beta$ (95% CI)                    | $\beta$ (95% CI)                     | $\beta$ (95% CI)        | $\beta$ (95% CI)                              | $\beta$ (95% CI)                 | $\beta$ (95% CI)                    | $\beta$ (95% CI)                     |
| Rural    | Ref.                 | Ref.                                          | Ref.                             | Ref.                                | Ref.                                 | Ref.                    | Ref.                                          | Ref.                             | Ref.                                | Ref.                                 |
| Urban    | 2.50*<br>(2.27-2.72) | 2.28*<br>(2.05-2.51)                          | 2.08*<br>(1.85-2.32)             | 2.10*<br>(1.86-2.33)                | 2.10*<br>(1.86-2.34)                 | 0.017*<br>(0.012-0.021) | 0.015*<br>(0.010-0.019)                       | 0.015*<br>(0.010-0.020)          | 0.016*<br>(0.011-0.021)             | 0.016*<br>(0.011-0.021)              |

\* $p < 0.001$ ; 982 participants with missing value for income and 4 participants with missing employment status excluded in all models for comparison; 17 participants with missing W/H-ratio excluded. Exclusion of missing values gives slightly different total estimates from Table 1; BMI, Body mass index; CI, Confidence interval; Ref., Reference category; W/H-ratio, Waist-hip ratio.

- (a) adjusted for age and gender (confounders)
- (b) adjusted for age, gender, and composite SES score
- (c) adjusted for age, gender, education, employment, and income
- (d) adjusted for age, gender, and education
- (e) adjusted for age, gender, education, and employment



## DISCUSSION

We found the prevalence of overweight and obesity, including central obesity to be higher in urban areas in Myanmar compared to rural areas. There was a consistent positive adjusted association between SES and BMI, while the association between SES and W/H-ratio was less consistent. Out of the socioeconomic factors, education was found to have the strongest association with BMI (general overweight and obesity), whereas income had the strongest association with W/H-ratio (central obesity). The association between urban-rural location and BMI was found to be partially mediated by the SES indicators with income, education, and employment status contributing almost equally. In the association between urban-rural location and W/H-ratio, the highest proportion was mediated by income.

A previous study from Myanmar report an 28% overall prevalence of overweight and 13% prevalence of obesity, which is higher than in the current study.<sup>18</sup> The higher prevalence could be due to the inclusion of adult women only and the use of Asian specific BMI cut-offs. However, our findings of a higher BMI and greater W/H-ratio in urban compared to rural areas corroborates previous studies conducted in Myanmar.<sup>14-16</sup> Further, it is also consistent with findings of studies carried out in other countries of the SEAR,<sup>33-37</sup> and of a global study conducted in 2010, which reported that the overall prevalence of overweight and obesity was higher in urban areas compared to their rural counterpart.<sup>38</sup> In contrast to our findings, a recent study composed of data from 2,009 population-based studies showed that BMI is rising at the same proportion or faster in rural areas compared to urban in LMICs except women in sub-Saharan Africa.<sup>12</sup> Similar study reported that mean BMI was generally higher in rural compared to urban men in South Asia while BMI increased at a similar rate in rural and urban men in East and Southeast Asia. The study also reported that changes in rural areas are driving the increase in mean BMI globally.<sup>12</sup> The authors suggested that improved road infrastructure and transportation has led to an increased access to high calorie foods, mechanized farming equipment, in addition to shifts from manual labour to more sedentary work,<sup>12</sup> i.e. an *urbanization* of the rural areas.

There is a paucity of studies investigating the association of all three socioeconomic factors (income, education, and employment status) with BMI and W/H-ratio in both male and female populations in Myanmar, hence the current study is the first to report these novel findings. In our study, higher income and higher education was associated with increased BMI, which is in accordance with a systematic review of studies investigating the association between SES and obesity in LMICs.<sup>6</sup> Additionally, a wide scale and much larger study

1  
2  
3 focusing on the association between socioeconomic factors and weight status across 53  
4 countries in 2010 found that the prevalence of obesity was highest in the richest quintile of the  
5 participants.<sup>38</sup> Another study from 70 low- middle- and high-income countries found a strong,  
6  
7 positive association between individual income and obesity.<sup>39</sup> Furthermore, our result  
8  
9 correspond with evidence from a systematic review of studies<sup>40</sup> and a study involving non-  
10 pregnant women from 37 developing countries,<sup>41</sup> which observed positive associations  
11 between education and obesity in low income countries. Several studies from Bangladesh,  
12 Nepal, India, and Sri Lanka also supports this.<sup>34-37,42</sup> Based on the Myanmar Demographic  
13 and Health Survey 2015-2016, 28% of Myanmar's population is living in urban areas.<sup>43</sup>  
14  
15 However, Myanmar is still considered to be in the early phase of the demographic transition.  
16  
17 Much of the current development is happening in the cities,<sup>44</sup> which indicates that many of the  
18 rural areas in Myanmar are not yet influenced by the ongoing urbanization of the country. The  
19 economic growth in Myanmar, has reduced the proportion of people living below the poverty  
20 line (a reduction in poverty from 48% to 25% between 2005 and 2017).<sup>45</sup> Because of the  
21 continuing economic development of the country, there may be an increase in sedentary  
22 lifestyle, higher income and more availability of processed food in urban areas, culminating to  
23 an increased burden of overweight and obesity as diet and physical activity are its major risk  
24 factors.<sup>46</sup> As rice is the main staple food of Myanmar, people generally consume high  
25 amounts of carbohydrates, which in turn is associated with high BMI.<sup>47,48</sup> In urban Myanmar  
26 residents, high intakes of fat and protein have been reported.<sup>49</sup> Moreover, the consumption of  
27 fast food and high caloric soft drinks and alcohol is higher in urban inhabitants compared to  
28 rural dwellers.<sup>48</sup> Additionally, in a study conducted in the Yangon region of Myanmar, the  
29 prevalence of physical inactivity was low, and no difference was observed between urban and  
30 rural residents.<sup>14</sup> However, most of the physical activity was linked to work, and high energy  
31 expenditure in the workplace was higher among rural- than among urban residents.<sup>14</sup> There  
32 may also be cultural determinants of BMI, as a larger body size often symbolizes high status  
33 and good health in Myanmar, which means that people with a high SES may even prefer a  
34 larger body size.<sup>48</sup> In LMICs, in general, high SES individuals have been found to have a  
35 higher energy intake, reflecting a greater access to both inexpensive energy dense foods and  
36 expensive higher-quality food items.<sup>50</sup> Rural populations in high income countries have  
37 excess BMI compared to urban populations.<sup>12,51-54</sup> As compared with urban populations in  
38 high income countries, rural populations often have lower income and education, limited  
39 access to healthy and fresh food choices, and they have less sports facilities and recreational  
40 activities, possibly explaining the higher rural BMI.<sup>55,56</sup> In high-income countries, the obesity  
41  
42  
43  
44  
45  
46  
47  
48  
49  
50  
51  
52  
53  
54  
55  
56  
57  
58  
59  
60

1  
2  
3 risk is often higher for individuals in low SES groups compared to high SES groups,<sup>57-60</sup> as  
4 those in the high SES groups are more likely to consume healthy foods, such as whole grains,  
5 lean meats, fish, low-fat dairy products, and fruit and vegetables.<sup>61,62</sup> They also more often  
6 have several physical activity opportunities and more knowledge about healthy choices.<sup>63</sup>  
7  
8  
9

10 We found that the association between urban-rural location and BMI was only partially  
11 mediated by socioeconomic factors such as income, education, and employment status. Our  
12 finding is in line with a study conducted in women in reproductive age in 38 LMICs,  
13 reporting that much, but not all of the urban-rural differences in BMI is driven by the  
14 socioeconomic composition (measured by household wealth).<sup>10</sup> This indicates that other  
15 important factors could explain the urban-rural BMI difference in Myanmar, including  
16 differences in non-leisure physical activity opportunities, less energy intensive occupation in  
17 urban areas, differences in neighbourhood environment, better transportation facilities, and  
18 better access to high ultra-processed and packaged food in urban areas.<sup>64-66</sup> Future prospective  
19 studies may be able to provide information that can explain this association. Road  
20 infrastructure and transportation facility is not well developed in the rural part of Myanmar.<sup>67</sup>  
21 As many as 40% of villages are without road access and additional 30% villages have access  
22 only part of the season, requiring the rural population to travel long distances to access  
23 markets and basic services leading to high energy expenditure.<sup>67</sup>  
24  
25  
26  
27  
28  
29  
30  
31  
32  
33  
34

### 35 Strengths and limitations

36  
37 The findings of this study add to the current research related to large population analyses of  
38 overweight and obesity. One of the major strengths of this study is the analyses of a large  
39 nationally representative sample of 8,390 participants that constitutes both urban and rural  
40 populations in Myanmar. In addition, the internationally recommended WHO STEPS protocol  
41 was diligently followed, and the outcome measures were assessed using standardised  
42 procedures. The response rate was high, at 91%. Moreover, we used W/H-ratio as the measure  
43 of central obesity in addition to BMI. There are, however, some limitations. The study was  
44 cross-sectional which means that causality cannot be determined, e.g. the temporal  
45 relationships between socioeconomic factors and obesity cannot be inferred; evidence  
46 suggests the association is likely to be bidirectional.<sup>68,69</sup> Furthermore, 982 participants refused  
47 to provide information on their income were excluded. These have a higher likelihood of  
48 belonging to lower income groups as most of them were unemployed, which may have given  
49 an underestimation of socioeconomic differences in BMI. At the analysis stage, 280  
50 participants were excluded from the study due to missing BMI values. As association  
51  
52  
53  
54  
55  
56  
57  
58  
59  
60

1  
2  
3 measures are robust, it is unlikely that this exclusion has substantially contributed to selection  
4 bias.<sup>70</sup> Institutionalized people like monks, nuns and soldiers were excluded from the  
5 sampling frame as their lifestyle may differ from most of the general population, which means  
6 that the findings can only be generalized to Myanmar's non-institutionalized population.  
7  
8  
9

## 10 CONCLUSION

11  
12  
13 The current study examines the relation between urban-rural location and socioeconomic  
14 factors with general- and central overweight and obesity in adult residents in Myanmar. Taken  
15 together, we found an independent and positive association between urban-rural location and  
16 BMI, partially, but not fully explained by socioeconomic factors. Mean BMI was higher  
17 among urban dwellers, individuals living above poverty line and in those with higher attained  
18 education level.  
19  
20  
21  
22

23  
24 Knowledge about the significant roles played by location of living (urban and rural) and  
25 socioeconomic factors in relation to overweight and obesity can contribute to the development  
26 of well-targeted policies. Currently, mainly behavioural factors have been emphasised in  
27 prevention strategies for the management of overweight and obesity in Myanmar. Our  
28 findings imply that there should also be a focus on socioeconomic factors in order to reduce  
29 the burden of overweight and obesity. Moreover, updated national or sub-national STEPS  
30 surveys should be conducted to continue monitoring the trends and urban-rural differences in  
31 overweight and obesity.  
32  
33  
34  
35  
36  
37

## 38 Footnotes

39  
40 **Contributors:** RT contributed to the design of the article, statistical analysis, interpreted the  
41 data and drafted the manuscript. EB, CD, and WPA contributed to the conception and design  
42 of the study and the article, interpretation of the data and the content of the article. All authors  
43 contributed revising the manuscript for important intellectual content and approved the final  
44 version to be published.  
45  
46  
47  
48

49 **Funding:** This research received no specific grant from any funding agency in the public,  
50 commercial or not-for-profit sectors.  
51  
52  
53

54 **Acknowledgments:** The authors acknowledge Professor, Tint Swe Latt, the principle  
55 investigator for the 2014 STEPS study. The authors are grateful to the World Health  
56 Organization, the University of Oslo and the Norwegian agency for Development  
57 Cooperation (Norad) for the project "Health and Sustainable development in Myanmar–  
58  
59  
60

1  
2  
3 Competence Building in Public Health and Medical Research and Education (MY-NORTH)  
4 Project: MMY-13/0049, NORHED, UiO:211782. We would like to thank all the participants,  
5 medical doctors from the Myanmar Medical Association, township medical officers, basic  
6 health staffs and local administrative authorities from all the surveyed areas.  
7  
8  
9

10 **Competing interests:** None declared

11  
12 **Patient consent:** Obtained

13  
14 **Data availability statement:** No additional data are available

## 15 16 17 REFERENCES

- 18  
19  
20 1. World Health Organization. Obesity and Overweight WHO; 2020 [Available from:  
21 <https://www.who.int/en/news-room/fact-sheets/detail/obesity-and-overweight> (accessed 18<sup>th</sup>  
22 May 2020).  
23  
24  
25  
26 2. Klein S, Allison DB, Heymsfield SB, et al. Waist Circumference and Cardiometabolic  
27 Risk: a Consensus Statement from Shaping America's Health: Association for Weight  
28 Management and Obesity Prevention; NAASO, the Obesity Society; the American Society for  
29 Nutrition; and the American Diabetes Association. *Obesity (Silver Spring, Md)*  
30 2007;15(5):1061-7. doi: 10.1038/oby.2007.632 [published Online First: 2007/05/15].  
31  
32  
33 3. Amato MC, Guarnotta V, Giordano C. Body composition assessment for the definition of  
34 cardiometabolic risk. *J Endocrinol Invest* 2013;36(7):537-43. doi: 10.3275/8943 [published  
35 Online First: 2013/04/25].  
36  
37  
38 4. World Health Organization. Global Health Observatory Data Repository (South-East Asia  
39 Region): Prevalence of overweight among adults, BMI  $\geq$  25, crude Estimates by WHO  
40 Region 2016 [updated September 27, 2017]. Available from:  
41 <http://apps.who.int/gho/data/view.main-searo.BMI25CREGv?lang=en> (accessed 18<sup>th</sup> May  
42 2020).  
43  
44  
45 5. World Health Organization. Global Health Observatory Data Repository (South-East Asia  
46 Region): Prevalence of obesity among adults, BMI  $\geq$  30, crude Estimates by WHO region  
47 2016 [updated September 22, 2017]. Available from: <http://apps.who.int/gho/data/view.main-searo.BMI30CREGv?lang=en> (accessed 18<sup>th</sup> May 2020).  
48  
49  
50  
51  
52  
53  
54  
55  
56  
57  
58  
59  
60

- 1  
2  
3 6. Dinsa GD, Goryakin Y, Fumagalli E, et al. Obesity and socioeconomic status in developing  
4 countries: a systematic review. *Obes Rev* 2012;13(11):1067-79. doi: 10.1111/j.1467-  
5 789X.2012.01017.x [published Online First: 2012/07/07].  
6  
7
- 8  
9 7. Ford ND, Patel SA, Narayan KM. Obesity in Low- and Middle-Income Countries: Burden,  
10 Drivers, and Emerging Challenges. *Annu Rev Public Health* 2017;38:145-64. doi:  
11 10.1146/annurev-publhealth-031816-044604 [published Online First: 2017/01/10].  
12  
13
- 14 8. Popkin BM, Adair LS, Ng SW. Global nutrition transition and the pandemic of obesity in  
15 developing countries. *Nutr Rev* 2012;70(1):3-21. doi: 10.1111/j.1753-4887.2011.00456.x  
16 [published Online First: 2012/01/10].  
17  
18
- 19 9. United Nations. 2018 revision of world urbanization prospects: United Nations Department  
20 of Economic and Social Affairs, 2018.  
21  
22
- 23 10. Neuman M, Kawachi I, Gortmaker S, et al. Urban-rural differences in BMI in low- and  
24 middle-income countries: the role of socioeconomic status. *Am J Clin Nutr* 2013;97(2):428-  
25 36. doi: 10.3945/ajcn.112.045997 [published Online First: 2013/01/02].  
26  
27  
28
- 29 11. McLaren L. Socioeconomic status and obesity. *Epidemiol Rev* 2007;29(1):29-48. doi:  
30 10.1093/epirev/mxm001 [published Online First: 2007/05/05].  
31  
32
- 33 12. Bixby H, Bentham J, Zhou B, et al. Rising rural body-mass index is the main driver of the  
34 global obesity epidemic in adults. *Nature* 2019;569(7755):260-64. doi: 10.1038/s41586-019-  
35 1171-x [published Online First: 2019/05/10].  
36  
37  
38
- 39 13. World Health Organization. Myanmar (Yangon Division) STEPS Survey 2004 Fact Sheet  
40 2004 [Available from:  
41 [https://www.who.int/ncds/surveillance/steps/Myanmar\\_2004\\_FactSheet.pdf](https://www.who.int/ncds/surveillance/steps/Myanmar_2004_FactSheet.pdf) (accessed 23<sup>rd</sup>  
42 April 2019).  
43  
44  
45
- 46 14. Htet AS, Bjertness MB, Sherpa LY, et al. Urban-rural differences in the prevalence of  
47 non-communicable diseases risk factors among 25-74 years old citizens in Yangon Region,  
48 Myanmar: a cross sectional study. *BMC Public Health* 2016;16(1):1225. doi:  
49 10.1186/s12889-016-3882-3 [published Online First: 2016/12/07].  
50  
51
- 52 15. World Health Organization. WHO STEPwise approach to NCD surveillance 2004,  
53 Myanmar Disaggregation of Urban and rural data (urban). Available from:  
54 <https://www.who.int/ncds/surveillance/steps/MyanmarSTEPSReport2004URBAN.pdf>  
55 (accessed 23<sup>rd</sup> April 2019).  
56  
57  
58  
59  
60

- 1  
2  
3 16. World Health Organization. WHO STEPwise approach to NCD surveillance 2004,  
4 Myanmar Disaggregation of Urban and rural data (rural). Available from:  
5 <https://www.who.int/ncds/surveillance/steps/MyanmarSTEPSReport2004RURAL.pdf>  
6 (accessed 23<sup>rd</sup> April 2019).  
7  
8  
9
- 10 17. World Health Organization. Noncommunicable Disease Risk Factor Survey Myanmar  
11 2009. 2011. [Available from:  
12 [https://www.who.int/ncds/surveillance/steps/2009\\_STEPS\\_Survey\\_Myanmar.pdf](https://www.who.int/ncds/surveillance/steps/2009_STEPS_Survey_Myanmar.pdf) (accessed  
13 23<sup>rd</sup> April 2019).  
14  
15  
16
- 17 18. Hong SA, Peltzer K, Lwin KT, et al. The prevalence of underweight, overweight and  
18 obesity and their related socio-demographic and lifestyle factors among adult women in  
19 Myanmar, 2015-16. *PLoS One* 2018;13(3):e0194454. doi: 10.1371/journal.pone.0194454  
20 [published Online First: 2018/03/17].  
21  
22  
23
- 24 19. Stokke K, Vakulchuk R, Øverland I. Myanmar: A political economy analysis. 2018.  
25  
26  
27
- 28 20. World Health Organization. Report on National Survey of Diabetes Mellitus and Risk  
29 Factors for Non-Communicable Diseases in Myanmar (2014). 2018. Available from:  
30 [www.who.int/ncds/surveillance/steps/Myanmar\\_2014\\_STEPS\\_Report.pdf](http://www.who.int/ncds/surveillance/steps/Myanmar_2014_STEPS_Report.pdf) (accessed 23<sup>rd</sup>  
31 April 2019).  
32  
33  
34
- 35 21. Elfil M, Negida A. Sampling methods in Clinical Research; an Educational Review.  
36 *Emerg (Tehran)* 2017;5(1):e52-e52. [published Online First: 2017/01/14].  
37  
38
- 39 22. Colditz GA, Willett WC, Rotnitzky A, et al. Weight gain as a risk factor for clinical  
40 diabetes mellitus in women. *Ann Intern Med* 1995;122(7):481-6. doi: 10.7326/0003-4819-  
41 122-7-199504010-00001 [published Online First: 1995/04/01].  
42  
43  
44
- 45 23. Pajak A, Kuulasmaa K, Tuomilehto J, et al. Geographical variation in the major risk  
46 factors of coronary heart disease in men and women aged 35-64 years : the WHO MONICA  
47 Project / prepared by Andrzej Pajak ... [et al.]. *World health statistics quarterly*  
48 1988;41(3/4):115-140. <https://apps.who.int/iris/handle/10665/51270>  
49  
50  
51
- 52 24. Bigaard J, Frederiksen K, Tjonneland A, et al. Waist circumference and body composition  
53 in relation to all-cause mortality in middle-aged men and women. *Int J Obes (Lond)*  
54 2005;29(7):778-84. doi: 10.1038/sj.ijo.0802976 [published Online First: 2005/05/27].  
55  
56  
57  
58  
59  
60

- 1  
2  
3 25. Janssen I, Katzmarzyk PT, Ross R. Waist circumference and not body mass index  
4 explains obesity-related health risk. *Am J Clin Nutr* 2004;79(3):379-84. doi:  
5 10.1093/ajcn/79.3.379 [published Online First: 2004/02/27].  
6  
7  
8  
9 26. Lim JU, Lee JH, Kim JS, et al. Comparison of World Health Organization and Asia-  
10 Pacific body mass index classifications in COPD patients. *Int J Chron Obstruct Pulmon Dis*  
11 2017;12:2465-75. doi: 10.2147/COPD.S141295  
12  
13  
14 27. WHO Expert Consultation. Appropriate body-mass index for Asian populations and its  
15 implications for policy and intervention strategies. *Lancet (London, England)*  
16 2004;363(9403):157.  
17  
18  
19  
20 28. World Health Organization. Waist circumference and waist-hip ratio: report of a WHO  
21 expert consultation, Geneva, 8-11 December 2008. 2011.  
22  
23  
24 29. The Republic of Union of Myanmar MoHA. The ward or village tract administration law  
25 2012 [Available from: [http://www.myanmar-law-library.org/law-library/laws-and-](http://www.myanmar-law-library.org/law-library/laws-and-regulations/laws/myanmar-laws-1988-until-now/union-solidarity-and-development-party-laws-2012-2016/myanmar-laws-2012/pyidaungsu-hluttaw-law-no-1-2012-ward-or-village-administration-law-burmese.html)  
26 [regulations/laws/myanmar-laws-1988-until-now/union-solidarity-and-development-party-](http://www.myanmar-law-library.org/law-library/laws-and-regulations/laws/myanmar-laws-1988-until-now/union-solidarity-and-development-party-laws-2012-2016/myanmar-laws-2012/pyidaungsu-hluttaw-law-no-1-2012-ward-or-village-administration-law-burmese.html)  
27 [laws-2012-2016/myanmar-laws-2012/pyidaungsu-hluttaw-law-no-1-2012-ward-or-village-](http://www.myanmar-law-library.org/law-library/laws-and-regulations/laws/myanmar-laws-1988-until-now/union-solidarity-and-development-party-laws-2012-2016/myanmar-laws-2012/pyidaungsu-hluttaw-law-no-1-2012-ward-or-village-administration-law-burmese.html)  
28 [administration-law-burmese.html](http://www.myanmar-law-library.org/law-library/laws-and-regulations/laws/myanmar-laws-1988-until-now/union-solidarity-and-development-party-laws-2012-2016/myanmar-laws-2012/pyidaungsu-hluttaw-law-no-1-2012-ward-or-village-administration-law-burmese.html) (accessed 20<sup>th</sup> October 2019).  
29  
30  
31  
32  
33 30. Central Bank of Myanmar. Reference exchange rate [Available from:  
34 <https://forex.cbm.gov.mm/index.php/fxrate> (accessed 20<sup>th</sup> August 2019).  
35  
36  
37  
38 31. Ferreira FH, Chen S, Dabalen A, et al. A global count of the extreme poor in 2012: data  
39 issues, methodology and initial results: The World Bank 2015.  
40  
41  
42 32. Textor J, van der Zander B, Gilthorpe MS, et al. Robust causal inference using directed  
43 acyclic graphs: the R package 'dagitty'. *Int J Epidemiol* 2016;45(6):1887-94. doi:  
44 10.1093/ije/dyw341 [published Online First: 2017/01/17].  
45  
46  
47 33. Angkurawaranon C, Jiraporncharoen W, Chenthanakij B, et al. Urban environments and  
48 obesity in southeast Asia: a systematic review, meta-analysis and meta-regression. *PLoS One*  
49 2014;9(11):e113547. doi: 10.1371/journal.pone.0113547 [published Online First:  
50 2014/11/27].  
51  
52  
53  
54 34. Biswas T, Garnett SP, Pervin S, et al. The prevalence of underweight, overweight and  
55 obesity in Bangladeshi adults: Data from a national survey. *PLoS One* 2017;12(5):e0177395.  
56 doi: 10.1371/journal.pone.0177395  
57  
58  
59  
60



- 1  
2  
3 35. Siddiqui ST, Kandala N-B, Stranges S. Urbanisation and geographic variation of  
4 overweight and obesity in India: a cross-sectional analysis of the Indian Demographic Health  
5 Survey 2005–2006. *Int J Public Health* 2015;60(6):717-26.  
6  
7  
8  
9 36. Biswas T, Townsend N, Islam MS, et al. Association between socioeconomic status and  
10 prevalence of non-communicable diseases risk factors and comorbidities in Bangladesh:  
11 findings from a nationwide cross-sectional survey. *BMJ Open* 2019;9(3):e025538. doi:  
12 10.1136/bmjopen-2018-025538  
13  
14  
15  
16 37. De Silva AP, De Silva SH, Haniffa R, et al. A cross sectional survey on social, cultural  
17 and economic determinants of obesity in a low middle income setting. *Int J Equity Health*  
18 2015;14(1):6. doi: 10.1186/s12939-015-0140-8 [published Online First: 2015/01/18].  
19  
20  
21  
22 38. Moore S, Hall JN, Harper S, et al. Global and national socioeconomic disparities in  
23 obesity, overweight, and underweight status. *J Obes* 2010;2010 doi: 10.1155/2010/514674  
24 [published Online First: 2010/08/20].  
25  
26  
27  
28 39. Masood M, Reidpath DD. Effect of national wealth on BMI: An analysis of 206,266  
29 individuals in 70 low-, middle- and high-income countries. *PLoS One* 2017;12(6):e0178928.  
30 doi: 10.1371/journal.pone.0178928 [published Online First: 2017/07/01].  
31  
32  
33  
34 40. Cohen AK, Rai M, Rehkopf DH, et al. Educational attainment and obesity: a systematic  
35 review. *Obes Rev* 2013;14(12):989-1005. doi: 10.1111/obr.12062 [published Online First:  
36 2013/07/25].  
37  
38  
39 41. Monteiro CA, Conde WL, Lu B, et al. Obesity and inequities in health in the developing  
40 world. *Int J Obes Relat Metab Disord* 2004;28(9):1181-86. doi: 10.1038/sj.ijo.0802716  
41 [published Online First: 2004/06/24].  
42  
43  
44  
45 42. Al Kibria GM. Prevalence and factors affecting underweight, overweight and obesity  
46 using Asian and World Health Organization cutoffs among adults in Nepal: Analysis of the  
47 Demographic and Health Survey 2016. *Obes Res Clin Pract* 2019;13(2):129-36. doi:  
48 <https://doi.org/10.1016/j.orcp.2019.01.006> [published Online First: 2019/02/06].  
49  
50  
51  
52 43. Health Mo, Sports - MoHS/Myanmar, ICF. Myanmar Demographic and Health Survey  
53 2015-16. Nay Pyi Taw, Myanmar: MoHS and ICF; 2017. Available from:  
54 <http://dhsprogram.com/pubs/pdf/FR324/FR324.pdf>  
55  
56  
57  
58  
59  
60

- 1  
2  
3 44. The World Bank. Myanmar's Urbanization: Creating Opportunities for All 2019.  
4 Available from: [https://www.worldbank.org/en/country/myanmar/publication/myanmars-](https://www.worldbank.org/en/country/myanmar/publication/myanmars-urbanization-creating-opportunities-for-all)  
5 [urbanization-creating-opportunities-for-all](https://www.worldbank.org/en/country/myanmar/publication/myanmars-urbanization-creating-opportunities-for-all) (accessed 28<sup>th</sup> August 2019).  
6  
7  
8  
9 45. The World Bank in Myanmar. Overview 2020. Available from:  
10 <https://www.worldbank.org/en/country/myanmar/overview> (accessed 11<sup>th</sup> June 2020).  
11  
12  
13 46. International Food Policy Research Institute. Global food policy report 2017. Washington,  
14 DC: International Food Policy Research Institute (IFPRI) 2017. doi:  
15 <https://doi.org/10.2499/9780896292529>  
16  
17  
18 47. Unwin D, Unwin J. Low carbohydrate diet to achieve weight loss and improve HbA1c in  
19 type 2 diabetes and pre-diabetes: experience from one general practice. *Practical Diabetes*  
20 2014;31(2):76-79. doi: 10.1002/pdi.1835  
21  
22  
23 48. Aye T, Aung M, Oo E. Diabetes mellitus in Myanmar: Socio-cultural challenges and  
24 strength. *Journal of Social Health and Diabetes* 2018;02(01):009-13. doi: 10.4103/2321-  
25 0656.120255  
26  
27  
28  
29 49. Hlaing HH, Liabsuetrakul T. Dietary intake, food pattern, and abnormal blood glucose  
30 status of middle-aged adults: a cross-sectional community-based study in Myanmar. *Food*  
31 *Nutr Res* 2016;60(1):28898. doi: 10.3402/fnr.v60.28898 [published Online First: 2016/05/07].  
32  
33  
34  
35 50. Mayen AL, Marques-Vidal P, Paccaud F, et al. Socioeconomic determinants of dietary  
36 patterns in low- and middle-income countries: a systematic review. *Am J Clin Nutr*  
37 2014;100(6):1520-31. doi: 10.3945/ajcn.114.089029 [published Online First: 2014/11/21].  
38  
39  
40  
41 51. Fogelholm M, Valve R, Absetz P, et al. Rural-urban differences in health and health  
42 behaviour: a baseline description of a community health-promotion programme for the  
43 elderly. *Scand J Public Health* 2006;34(6):632-40. doi: 10.1080/14034940600616039  
44 [published Online First: 2006/11/30].  
45  
46  
47  
48 52. Jackson JE, Doescher MP, Jerant AF, et al. A national study of obesity prevalence and  
49 trends by type of rural county. *J Rural Health* 2005;21(2):140-8. doi: 10.1111/j.1748-  
50 0361.2005.tb00074.x [published Online First: 2005/04/30].  
51  
52  
53  
54 53. Befort CA, Nazir N, Perri MG. Prevalence of obesity among adults from rural and urban  
55 areas of the United States: findings from NHANES (2005-2008). *J Rural Health*  
56 2012;28(4):392-7. doi: 10.1111/j.1748-0361.2012.00411.x [published Online First:  
57 2012/10/23].  
58  
59  
60

- 1  
2  
3 54. Marques A, Peralta M, Naia A, et al. Prevalence of adult overweight and obesity in 20  
4 European countries, 2014. *Eur J Public Health* 2018;28(2):295-300. doi:  
5 10.1093/eurpub/ckx143 [published Online First: 2017/10/17].  
6  
7  
8  
9 55. Seguin R, Connor L, Nelson M, et al. Understanding barriers and facilitators to healthy  
10 eating and active living in rural communities. *J Nutr Metab* 2014;2014:146502. doi:  
11 10.1155/2014/146502 [published Online First: 2015/01/13].  
12  
13  
14 56. Liese AD, Weis KE, Pluto D, et al. Food store types, availability, and cost of foods in a  
15 rural environment. *J Am Diet Assoc* 2007;107(11):1916-23. doi: 10.1016/j.jada.2007.08.012  
16 [published Online First: 2007/10/30].  
17  
18  
19 57. Pigeyre M, Rousseaux J, Trouiller P, et al. How obesity relates to socio-economic status:  
20 identification of eating behavior mediators. *Int J Obes (Lond)* 2016;40(11):1794-801. doi:  
21 10.1038/ijo.2016.109 [published Online First: 2016/07/06].  
22  
23  
24 58. Wang Y, Beydoun MA. The obesity epidemic in the United States--gender, age,  
25 socioeconomic, racial/ethnic, and geographic characteristics: a systematic review and meta-  
26 regression analysis. *Epidemiol Rev* 2007;29(1):6-28. doi: 10.1093/epirev/mxm007 [published  
27 Online First: 2007/05/19].  
28  
29  
30 59. Sobal J, Stunkard AJ. Socioeconomic status and obesity: a review of the literature.  
31 *Psychol Bull* 1989;105(2):260-75. doi: 10.1037/0033-2909.105.2.260 [published Online First:  
32 1989/03/01].  
33  
34  
35 60. Ameye H, Swinnen J. Obesity, income and gender: The changing global relationship.  
36 *Global Food Security* 2019;23:267-81. doi: 10.1016/j.gfs.2019.09.003  
37  
38  
39 61. Giskes K, Avendano M, Brug J, et al. A systematic review of studies on socioeconomic  
40 inequalities in dietary intakes associated with weight gain and overweight/obesity conducted  
41 among European adults. *Obes Rev* 2010;11(6):413-29. doi: 10.1111/j.1467-  
42 789X.2009.00658.x [published Online First: 2009/11/06].  
43  
44  
45 62. Darmon N, Drewnowski A. Does social class predict diet quality? *Am J Clin Nutr*  
46 2008;87(5):1107-17. doi: 10.1093/ajcn/87.5.1107 [published Online First: 2008/05/13].  
47  
48  
49 63. Miech R, Pampel F, Kim J, et al. The Enduring Association between Education and  
50 Mortality: The Role of Widening and Narrowing Disparities. *Am Sociol Rev* 2011;76(6):913-  
51 34. doi: 10.1177/0003122411411276 [published Online First: 2011/12/01].  
52  
53  
54  
55  
56  
57  
58  
59  
60

- 1  
2  
3 64. Popkin BM. Technology, transport, globalization and the nutrition transition food policy.  
4 *Food Policy* 2006;31(6):554-69. doi: 10.1016/j.foodpol.2006.02.008  
5  
6  
7 65. Solomons NW, Gross R. Urban nutrition in developing countries. *Nutr Rev* 1995;53(4 Pt  
8 1):90-5. doi: 10.1111/j.1753-4887.1995.tb01526.x [published Online First: 1995/04/01].  
9  
10  
11 66. Mohammed SH, Habtewold TD, Birhanu MM, et al. Neighbourhood socioeconomic  
12 status and overweight/obesity: a systematic review and meta-analysis of epidemiological  
13 studies. *BMJ Open* 2019;9(11):e028238. doi: 10.1136/bmjopen-2018-028238 [published  
14 Online First: 2019/11/16].  
15  
16  
17 67. Asian Development Bank. Myanmar Transport Sector Policy Note: Rural Roads and  
18 Access. 2016. Available from:  
19  
20  
21 <https://www.adb.org/sites/default/files/publication/189079/mya-rural-roads.pdf> (accessed 22<sup>nd</sup>  
22 April, 2020).  
23  
24  
25  
26 68. Kim TJ, von dem Knesebeck O. Income and obesity: what is the direction of the  
27 relationship? A systematic review and meta-analysis. *BMJ Open* 2018;8(1):e019862. doi:  
28 10.1136/bmjopen-2017-019862 [published Online First: 2018/01/08].  
29  
30  
31 69. Kim TJ, Roesler NM, von dem Knesebeck O. Causation or selection - examining the  
32 relation between education and overweight/obesity in prospective observational studies: a  
33 meta-analysis. *Obes Rev* 2017;18(6):660-72. doi: 10.1111/obr.12537 [published Online First:  
34 2017/04/13].  
35  
36  
37 70. Sogaard AJ, Selmer R, Bjertness E, et al. The Oslo Health Study: The impact of self-  
38 selection in a large, population-based survey. *Int J Equity Health* 2004;3(1):3. doi:  
39 10.1186/1475-9276-3-3 [published Online First: 2004/05/07].  
40  
41  
42  
43

## 44 **Figures**

45  
46  
47 Figure 1: Proportion of participants with high Body mass index (BMI) (above Asian  
48 overweight and obesity cut-off) and Waist-hip ratio (W/H-ratio), with 95% confidence  
49 interval, of 25-64 years old Myanmar residents by urban-rural location and gender  
50  
51

52  
53 Figure 2: Prevalence of overweight (BMI 25-29.9), obesity (BMI  $\geq$ 30) and central obesity  
54 (W/H-ratio  $>$ 0.9 for males and W/H-ratio  $>$ 0.85 for females) across three levels of SES  
55 (calculated composite SES score) among 25-64 years old Myanmar residents, by gender  
56  
57  
58  
59  
60

Figure 1: Proportion of participants with high Body mass index (BMI) (above Asian overweight and obesity cut-off) and Waist-hip ratio (W/H-ratio), with 95% confidence interval, of 25-64 years old Myanmar residents by urban-rural location and gender

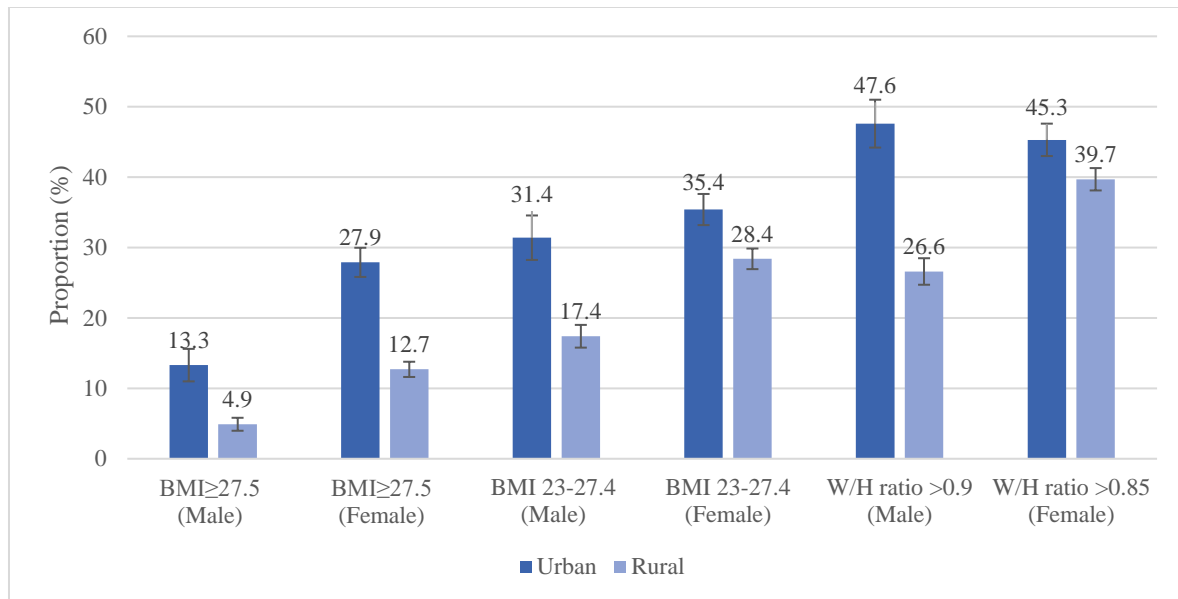

Figure 2: Prevalence of overweight (BMI 25-29.9), obesity (BMI  $\geq 30$ ) and central obesity (W/H-ratio  $>0.9$  for males and W/H-ratio  $>0.85$  for females) across three levels of SES (calculated composite SES score) among 25-64 years old Myanmar residents, by gender



## Supplementary Figure 1: DAGs for the casual relationship between exposure and outcome

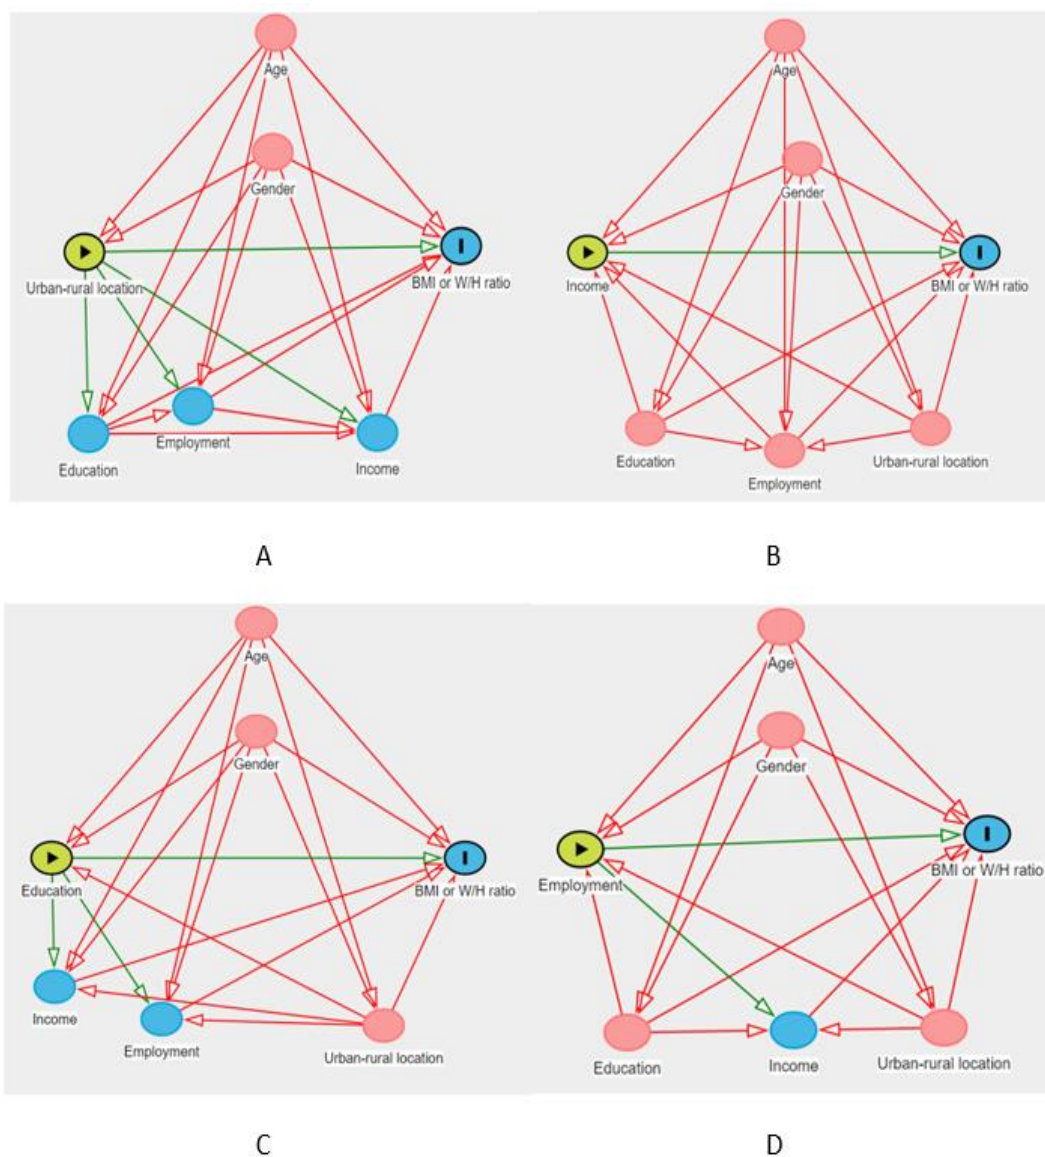

A: showing hypothesized causal relationships between urban-rural location and BMI or W/H-ratio, adjusted for age and gender

B: showing hypothesized causal relationships between income and BMI or W/H-ratio, adjusted for age, gender, urban-rural location, education, and employment

C: showing hypothesized causal relationships between education and BMI or W/H-ratio, adjusted for age, gender and urban-rural location

D: showing hypothesized causal relationships between employment and BMI or W/H-ratio, adjusted for age, gender, urban-rural location and education

Supplementary Table 1: Socioeconomic status (SES) score: description of the variable, calculation procedure, score range and SES groups

|                  | <b>Variables combined</b> | <b>Variables value</b>                               | <b>Score range</b> | <b>SES groups</b>                |
|------------------|---------------------------|------------------------------------------------------|--------------------|----------------------------------|
| <b>SES score</b> | Education                 | Low education= 0 (below high school completion)      | 0-3                | Low (Total SES score 0)          |
|                  |                           | High education= 1 (high school completion and above) |                    |                                  |
|                  | Income                    | Below poverty line= 0                                |                    | Medium (Total SES score 1 and 2) |
|                  |                           | Above poverty line= 1                                |                    |                                  |
|                  | Employment                | Unemployed= 0                                        |                    | High (Total SES score 3)         |
|                  |                           | Employed= 1                                          |                    |                                  |



**STROBE 2007 (v4) Statement—Checklist of items that should be included in reports of *cross-sectional studies***

| Section/Topic                | Item # | Recommendation                                                                                                                                                                       | Reported on page # |
|------------------------------|--------|--------------------------------------------------------------------------------------------------------------------------------------------------------------------------------------|--------------------|
| <b>Title and abstract</b>    | 1      | (a) Indicate the study’s design with a commonly used term in the title or the abstract                                                                                               | 1                  |
|                              |        | (b) Provide in the abstract an informative and balanced summary of what was done and what was found                                                                                  | 1                  |
| <b>Introduction</b>          |        |                                                                                                                                                                                      |                    |
| Background/rationale         | 2      | Explain the scientific background and rationale for the investigation being reported                                                                                                 | 2-3                |
| Objectives                   | 3      | State specific objectives, including any prespecified hypotheses                                                                                                                     | 3                  |
| <b>Methods</b>               |        |                                                                                                                                                                                      |                    |
| Study design                 | 4      | Present key elements of study design early in the paper                                                                                                                              | 3                  |
| Setting                      | 5      | Describe the setting, locations, and relevant dates, including periods of recruitment, exposure, follow-up, and data collection                                                      | 3-5                |
| Participants                 | 6      | (a) Give the eligibility criteria, and the sources and methods of selection of participants                                                                                          | 3-4                |
| Variables                    | 7      | Clearly define all outcomes, exposures, predictors, potential confounders, and effect modifiers. Give diagnostic criteria, if applicable                                             | 5-7                |
| Data sources/<br>measurement | 8*     | For each variable of interest, give sources of data and details of methods of assessment (measurement). Describe comparability of assessment methods if there is more than one group | 5-6                |
| Bias                         | 9      | Describe any efforts to address potential sources of bias                                                                                                                            | 7                  |
| Study size                   | 10     | Explain how the study size was arrived at                                                                                                                                            | 4                  |
| Quantitative variables       | 11     | Explain how quantitative variables were handled in the analyses. If applicable, describe which groupings were chosen and why                                                         | 6-7                |
| Statistical methods          | 12     | (a) Describe all statistical methods, including those used to control for confounding                                                                                                | 6-7                |
|                              |        | (b) Describe any methods used to examine subgroups and interactions                                                                                                                  |                    |
|                              |        | (c) Explain how missing data were addressed                                                                                                                                          | 10, 11, 13         |
|                              |        | (d) If applicable, describe analytical methods taking account of sampling strategy                                                                                                   |                    |
|                              |        | (e) Describe any sensitivity analyses                                                                                                                                                |                    |
| <b>Results</b>               |        |                                                                                                                                                                                      |                    |

|                          |     |                                                                                                                                                                                                                                                                                                                                                                                                               |              |
|--------------------------|-----|---------------------------------------------------------------------------------------------------------------------------------------------------------------------------------------------------------------------------------------------------------------------------------------------------------------------------------------------------------------------------------------------------------------|--------------|
| Participants             | 13* | (a) Report numbers of individuals at each stage of study—eg numbers potentially eligible, examined for eligibility, confirmed eligible, included in the study, completing follow-up, and analysed<br>(b) Give reasons for non-participation at each stage<br>(c) Consider use of a flow diagram                                                                                                               | 4            |
| Descriptive data         | 14* | (a) Give characteristics of study participants (eg demographic, clinical, social) and information on exposures and potential confounders<br>(b) Indicate number of participants with missing data for each variable of interest                                                                                                                                                                               | 9<br>9       |
| Outcome data             | 15* | Report numbers of outcome events or summary measures                                                                                                                                                                                                                                                                                                                                                          | 5            |
| Main results             | 16  | (a) Give unadjusted estimates and, if applicable, confounder-adjusted estimates and their precision (eg, 95% confidence interval). Make clear which confounders were adjusted for and why they were included<br>(b) Report category boundaries when continuous variables were categorized<br>(c) If relevant, consider translating estimates of relative risk into absolute risk for a meaningful time period | 10-13<br>6-7 |
| Other analyses           | 17  | Report other analyses done—eg analyses of subgroups and interactions, and sensitivity analyses                                                                                                                                                                                                                                                                                                                | 13           |
| <b>Discussion</b>        |     |                                                                                                                                                                                                                                                                                                                                                                                                               |              |
| Key results              | 18  | Summarise key results with reference to study objectives                                                                                                                                                                                                                                                                                                                                                      | 14           |
| Limitations              | 19  | Discuss limitations of the study, taking into account sources of potential bias or imprecision. Discuss both direction and magnitude of any potential bias                                                                                                                                                                                                                                                    | 16           |
| Interpretation           | 20  | Give a cautious overall interpretation of results considering objectives, limitations, multiplicity of analyses, results from similar studies, and other relevant evidence                                                                                                                                                                                                                                    | 14-16        |
| Generalisability         | 21  | Discuss the generalisability (external validity) of the study results                                                                                                                                                                                                                                                                                                                                         | 17           |
| <b>Other information</b> |     |                                                                                                                                                                                                                                                                                                                                                                                                               |              |
| Funding                  | 22  | Give the source of funding and the role of the funders for the present study and, if applicable, for the original study on which the present article is based                                                                                                                                                                                                                                                 | 17           |

\*Give information separately for cases and controls in case-control studies and, if applicable, for exposed and unexposed groups in cohort and cross-sectional studies.

**Note:** An Explanation and Elaboration article discusses each checklist item and gives methodological background and published examples of transparent reporting. The STROBE checklist is best used in conjunction with this article (freely available on the Web sites of PLoS Medicine at <http://www.plosmedicine.org/>, Annals of Internal Medicine at <http://www.annals.org/>, and Epidemiology at <http://www.epidem.com/>). Information on the STROBE Initiative is available at [www.strobe-statement.org](http://www.strobe-statement.org).
