# Supplementary material for: Urban–rural differences in overweight and obesity among 25–64 years old Myanmar residents: a cross-sectional, nationwide survey
Source: PubMed Central journal article supplement — BMJ Open. 2021 Mar 2;11(3):e042561. doi: 10.1136/bmjopen-2020-042561 (PMC7929804; doi:10.1136/bmjopen-2020-042561), 2021-03-02
Supplement: bmjopen-2020-042561supp001.pdf [file bmjopen-2020-042561supp001.pdf]

Supplementary Table 1: Socioeconomic status (SES) score: description of the variable, calculation procedure, score range and SES groups

|                  | <b>Variables combined</b> | <b>Variables value</b>                               | <b>Score range</b> | <b>SES groups</b>        |
|------------------|---------------------------|------------------------------------------------------|--------------------|--------------------------|
| <b>SES score</b> | Education                 | Low education= 0 (below high school completion)      | 0-3                | Low (Total SES score 0)  |
|                  |                           | High education= 1 (high school completion and above) |                    |                          |
|                  | Income                    | Below poverty line= 0                                |                    | High (Total SES score 3) |
|                  |                           | Above poverty line= 1                                |                    |                          |
|                  | Employment                | Unemployed= 0                                        |                    |                          |
|                  |                           | Employed= 1                                          |                    |                          |
