# Supplementary material for: Urban–rural differences in overweight and obesity among 25–64 years old Myanmar residents: a cross-sectional, nationwide survey
Source: PubMed Central journal article supplement — BMJ Open. 2021 Mar 2;11(3):e042561. doi: 10.1136/bmjopen-2020-042561 (PMC7929804; doi:10.1136/bmjopen-2020-042561), 2021-03-02
Supplement: bmjopen-2020-042561supp002.pdf [file bmjopen-2020-042561supp002.pdf]

Supplementary Figure 1: DAGs for the casual relationship between exposure and outcome

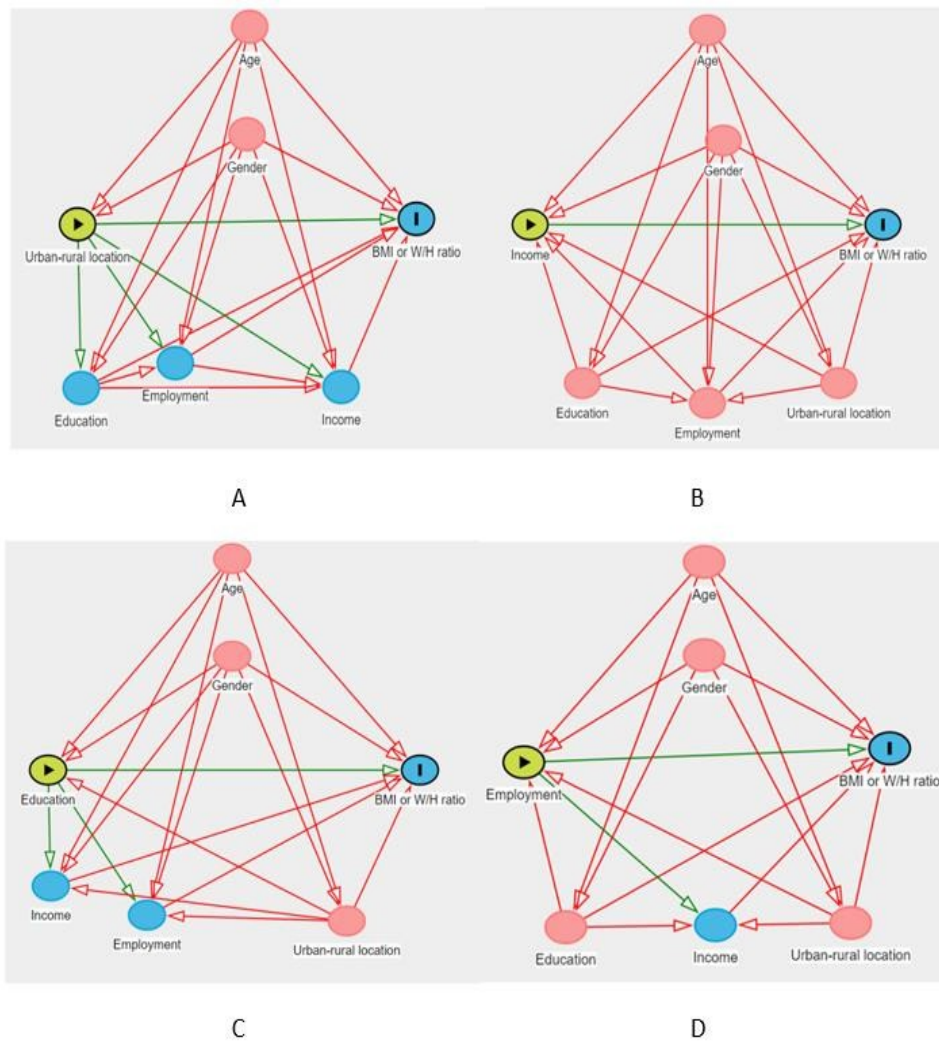

A: showing hypothesized causal relationships between urban-rural location and BMI or W/H-ratio, adjusted for age and gender

B: showing hypothesized causal relationships between income and BMI or W/H-ratio, adjusted for age, gender, urban-rural location, education, and employment

C: showing hypothesized causal relationships between education and BMI or W/H-ratio, adjusted for age, gender and urban-rural location

D: showing hypothesized causal relationships between employment and BMI or W/H-ratio, adjusted for age, gender, urban-rural location and education
